# Supplementary material
Source: PubMed Central journal article supplement (PMC5530686)
Supplement: pnas.1704632114.sfig07.pdf [file pnas.1704632114.sfig07.pdf]

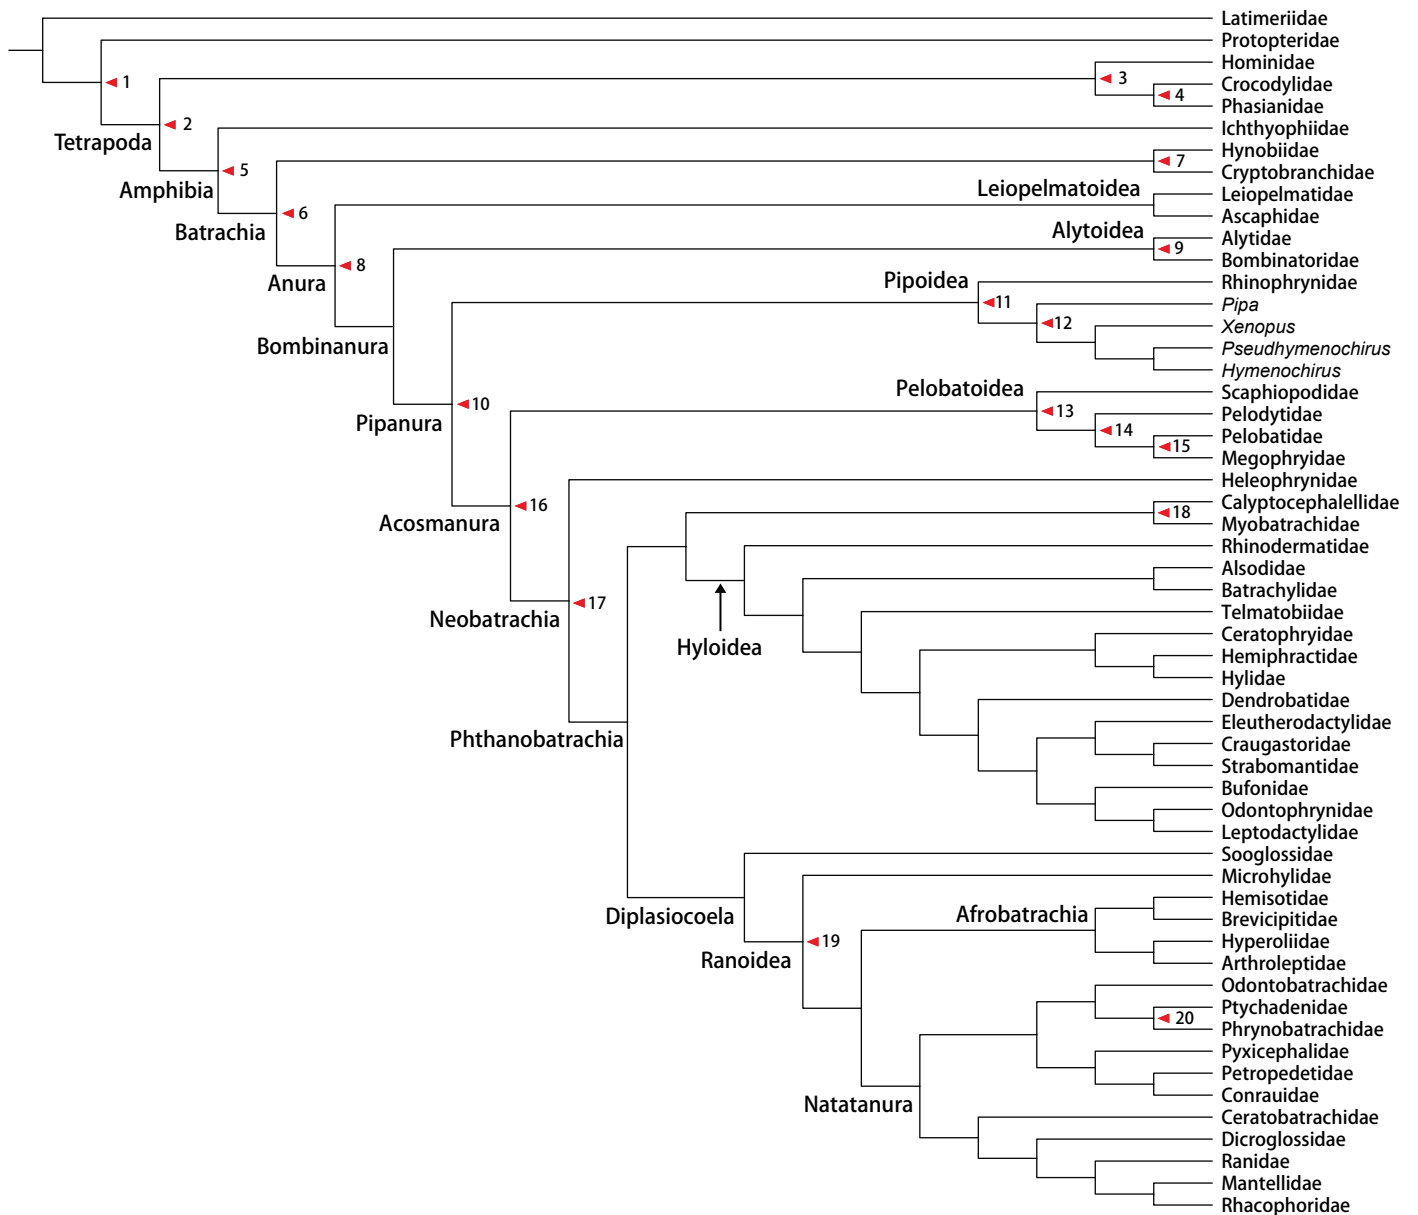

| Num | Node to be calibrated                     | Fossils                                   | Minimum | Soft Maximum | Source                                |
|-----|-------------------------------------------|-------------------------------------------|---------|--------------|---------------------------------------|
| 1   | Choanata                                  | † <i>Youngolepis</i>                      | 408     | 427          | Benton et al. (2015)                  |
| 2   | Tetrapoda                                 | † <i>Lethiscus stocki</i>                 | 337     | 351          | Benton et al. (2015)                  |
| 3   | Amniota                                   | † <i>Hylonomus lyelli</i>                 | 318     | 332.9        | Benton et al. (2015)                  |
| 4   | Crocodile and birds                       | † <i>Ctenosaurus koeneri</i>              | 247.1   | 260.2        | Benton et al. (2015)                  |
| 5   | Amphibia (Liss-)                          | † <i>Gerobatrachus hottoni</i>            | 270.6   | 337          | Anderson (2008)                       |
| 6   | Batrachia                                 | † <i>Triadobatrachus massinoti</i>        | 252     | 272.8        | Cannatella (2015); Benton et al. 2015 |
| 7   | Cryptobranchoidea                         | † <i>Chunerpeton tianyiensis</i>          | 161.2   | 252          | Gao and Shubin (2003)                 |
| 8   | Anura                                     | † <i>Liaobatrachus zhaoi</i>              | 129.7   | 252          | Chang et al. (2009)                   |
| 9   | Alytoidea                                 | † <i>Iberobatrachus angelae</i>           | 125     | 252          | Gomez et al. (2016)                   |
| 10  | Pipanura                                  | † <i>Rhadinosteus parvus</i>              | 148.1   | 252          | Cannatella (2015)                     |
| 11  | Pipoidea                                  | † <i>Neusibatrachus wilferti</i>          | 127.2   | 252          | Gomez et al. (2016)                   |
| 12  | Pipidae                                   | † <i>Pachycentra taqueti</i>              | 83.6    | 148.1        | Cannatella (2015)                     |
| 13  | Pelobatoidea                              | † <i>Elkobatrachus brocki</i>             | 46.1    | 148.1        | Henrici and Haynes (2006)             |
| 14  | Pelodytes + (Pelobatidae + Megophryidae)  | † <i>Miopelodytes gilmorei</i>            | 38.9    | 148.1        | Henrici and Haynes (2006)             |
| 15  | Pelobatidae + Megophryidae                | † <i>Macropelobates osborni</i>           | 28.1    | 148.1        | Cohen et al. (2013)                   |
| 16  | Acosmanura                                | † <i>Eurycephalella alcinae</i>           | 113     | 252          | Baez (2009)                           |
| 17  | Neobatrachia                              | † <i>Beelzebufo ampinga</i>               | 66      | 148.1        | Rogers et al. (2013)                  |
| 18  | Myobatrachoidea                           | † <i>Calyptocephalella pichileufensis</i> | 47.5    | 148.1        | Gomez et al. (2011)                   |
| 19  | Ranoidea                                  | † <i>Thamastosaurus gezei</i>             | 33.9    | 148.1        | Rage and Rocek (2007)                 |
| 20  | Node between Ptychadena + Phrynobatrachus | Ptychadenidae fossil                      | 25      | 148.1        | Blackburn et al. (2015)               |

## References

- Anderson JS (2008) Focal review: the origin (s) of modern amphibians. *Evolutionary Biology*, 35, 231–247.
- Báez AM, Moura GJB, Gómez RO (2009) Anurans from the Lower Cretaceous Crato Formation of northeastern Brazil: implications for the early divergence of neobatrachians. *Cretaceous Research*, 30, 829–846.
- Benton MJ, Donoghue PCJ, Asher RJ *et al.* (2015) Constraints on the timescale of animal evolutionary history. *Paleontologica Electronica*, 18.1.1FC, 1–106.
- Blackburn DC, Roberts EM, Stevens NJ (2015) The earliest record of the endemic African frog family Ptychadenidae from the Oligocene Nsungwe Formation of Tanzania. *Journal of Vertebrate Paleontology*, 35, e907174.
- Cannatella D (2015) Xenopus in space and time: fossils, node calibrations, tip-dating, and paleobiogeography. *Cytogenetic and Genome Research*, 145, 283–301.
- Chang S, Zhang H, Renne PR, Fang Y (2009) High-precision  $^{40}\text{Ar}/^{39}\text{Ar}$  age for the Jehol Biota. *Palaeogeography, Palaeoclimatology, Palaeoecology*, 280, 94–104.
- Cohen KM, Finney SC, Gibbard PL, Fan JX (2013) The ICS international chronostratigraphic chart. *Episodes*, 36, 199–204.
- Gao K-Q, Shubin NH (2003) Earliest known crown-group salamanders. *Nature*, 422, 424–428.
- Gómez RO, Turazzini GF (2016) An overview of the ilium of anurans (Lissamphibia, Salientia), with a critical appraisal of the terminology and primary homology of main ilial features. 1. *Journal of Vertebrate Paleontology*, 36, e1030023.
- Henrici AC, Haynes SR (2006) *Elkobatrachus brocki*, a new pelobatid (Amphibia: Anura) from the Eocene Elko Formation of Nevada. *Annals of Carnegie Museum*, 75, 247–257.
- Rage J-C, Roček Z (2007) A new species of *Thaumastosaurus* (Amphibia : Anura) from the Eocene of Europe. *Journal of Vertebrate Paleontology*, 27, 329–336.
- Rogers RR, Krause DW, Kast SC *et al.* (2013) A new, richly fossiliferous member comprised of tidal deposits in the Upper Cretaceous Maevarano Formation, northwestern Madagascar. *Cretaceous Research*, 44, 12–29.
