# Supplementary material
Source: PubMed Central journal article supplement (PMC5530686)
Supplement: pnas.1704632114.sfig09.pdf [file pnas.1704632114.sfig09.pdf]

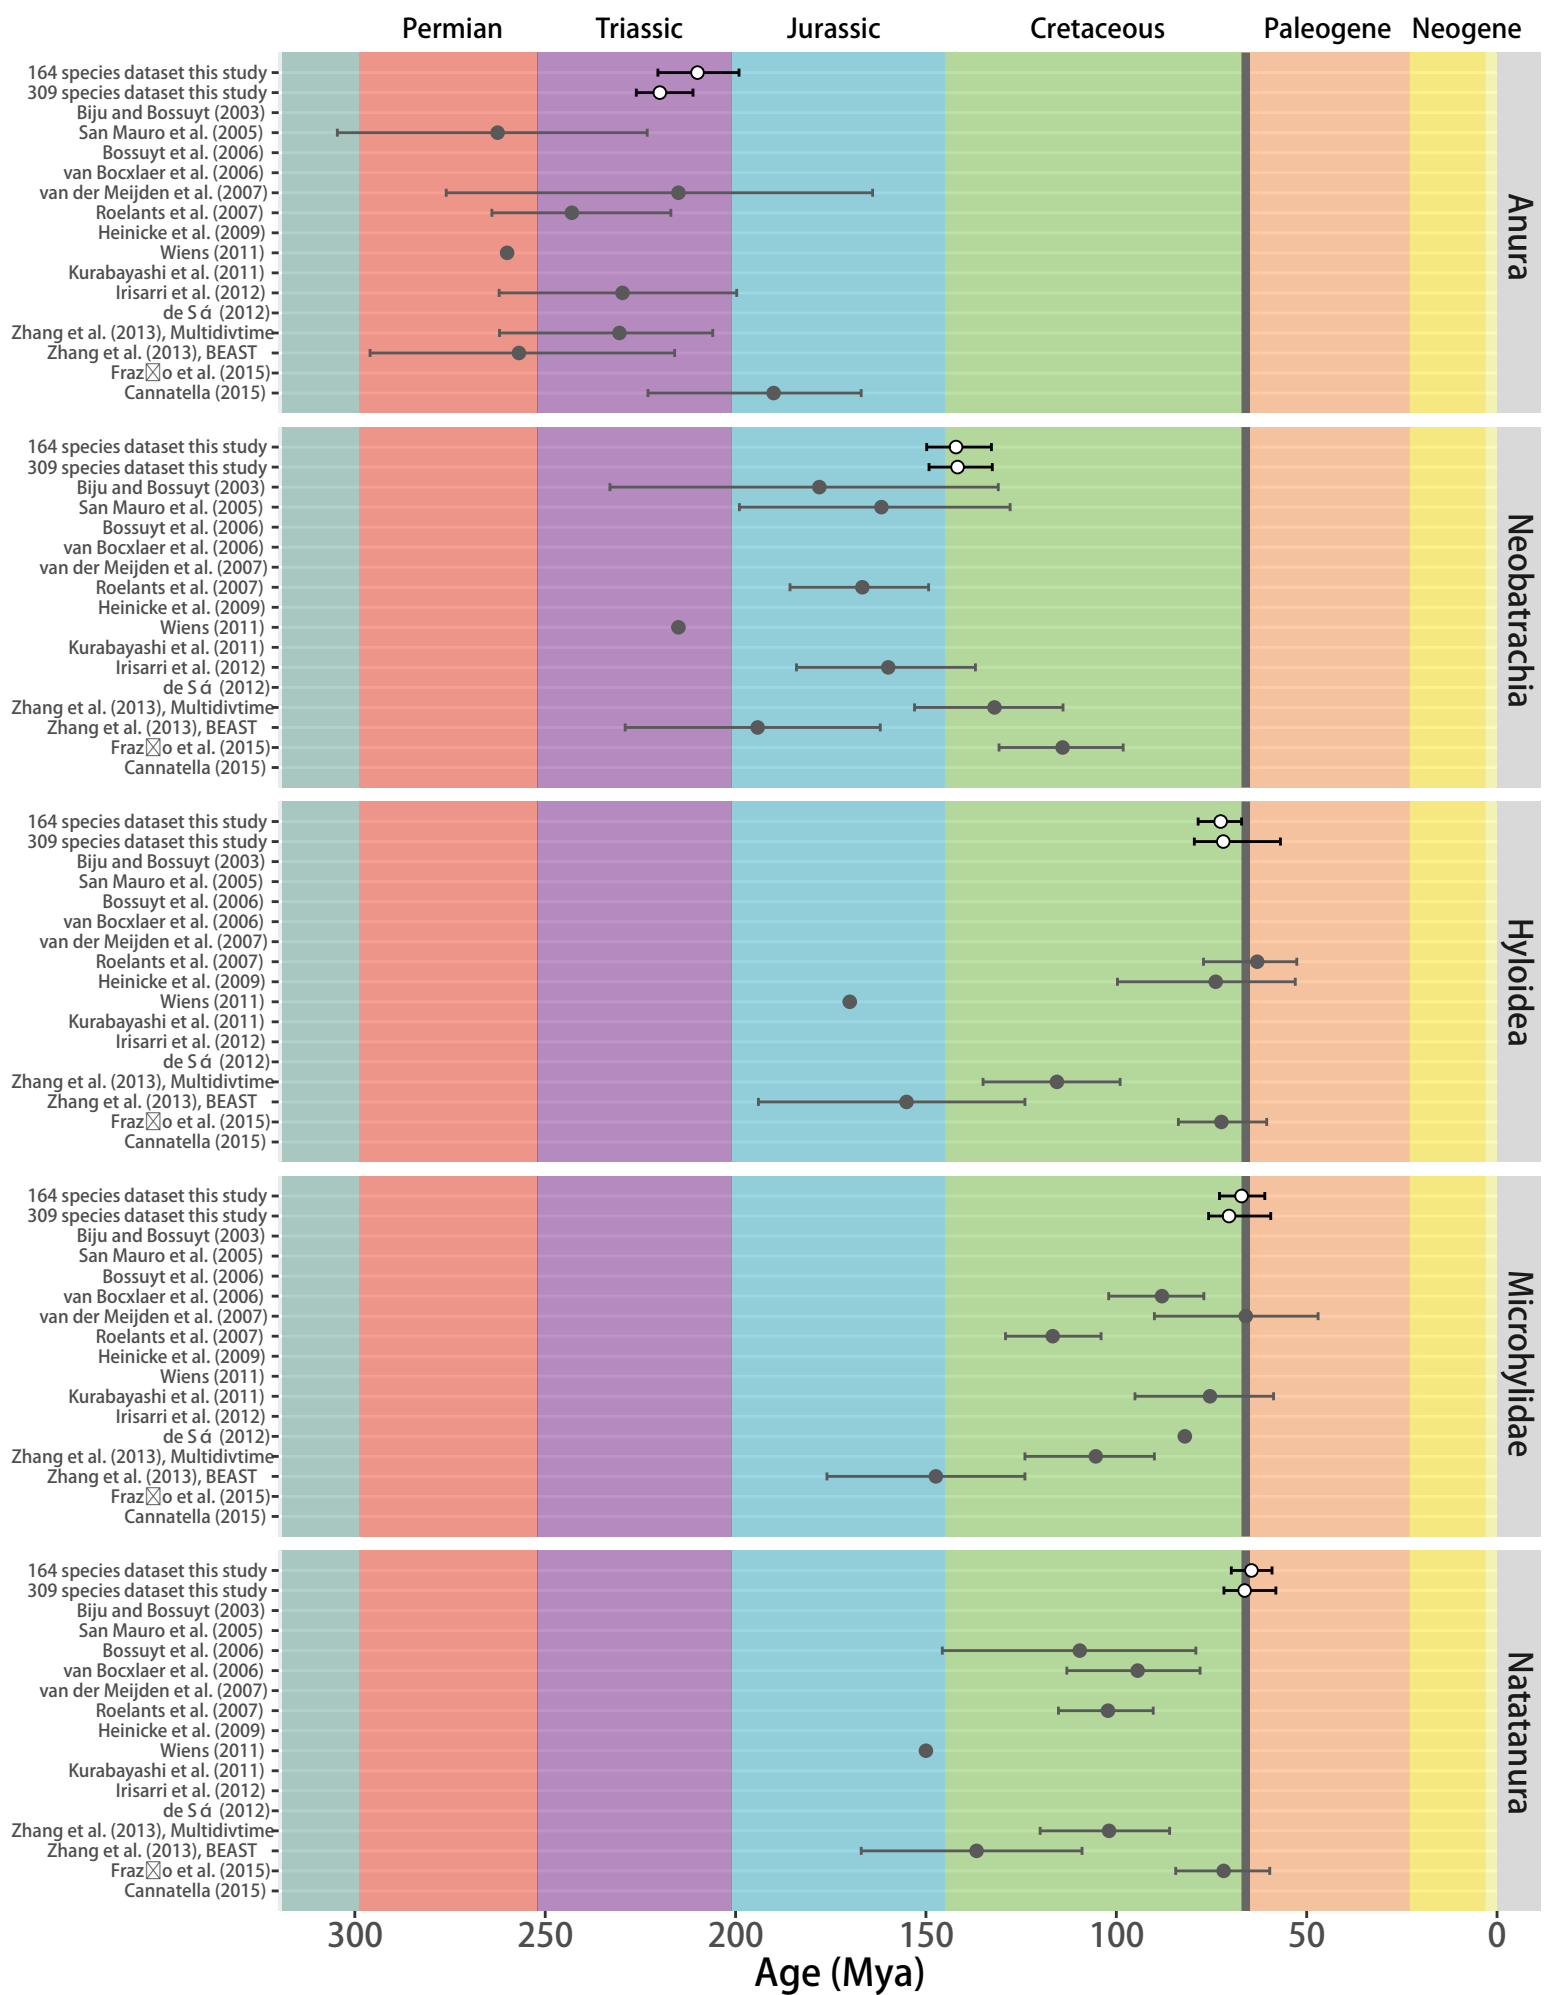

## References

- Biju SD, Bossuyt F (2003) New frog family from India reveals an ancient biogeographical link with the Seychelles. *Nature*, 425, 711–714.
- Bossuyt F, Brown R, Hillis D, Cannatella D, Milinkovitch M (2006) Phylogeny and biogeography of a cosmopolitan frog radiation: Late Cretaceous diversification resulted in continent-scale endemism in the family Ranidae. *Systematic Biology*, 55, 579–594.
- Cannatella D (2015) *Xenopus* in space and time: fossils, node calibrations, tip-dating, and paleobiogeography. *Cytogenetic and Genome Research*, 145, 283–301.
- de Sá RO, Streicher JW, Sekonyela R *et al.* (2012) Molecular phylogeny of microhylid frogs (Anura: Microhylidae) with emphasis on relationships among New World genera. *BMC Evolutionary Biology*, 12, 241.
- Frazaõ A, Silva HR da, Russo CA de M (2015) The gondwana breakup and the history of the Atlantic and Indian oceans unveils two new clades for early neobatrachian diversification (A Rzhetsky, Ed.). *PLOS ONE*, 10, e0143926.
- Heinicke MP, Duellman WE, Trueb L *et al.* (2009) A new frog family (Anura: Terrarana) from South America and an expanded direct-developing clade revealed by molecular phylogeny. *Zootaxa*, 35, 1–35.
- Irisarri I, Mauro DS, Abascal F *et al.* (2012) The origin of modern frogs (Neobatrachia) was accompanied by acceleration in mitochondrial and nuclear substitution rates. *BMC Genomics*, 13, 626.
- Kurabayashi A, Matsui M, Belabut DM *et al.* (2011) From Antarctica or Asia? New colonization scenario for Australian-New Guinean narrow mouth toads suggested from the findings on a mysterious genus *Gastrophrynoidea*. *BMC Evolutionary Biology*, 11, 175.
- van Bocxlaer I, Roelants K, Biju SD, Nagaraju J, Bossuyt F (2006) Late Cretaceous vicariance in Gondwanan amphibians. *PLOS ONE*, 1, e74.
- van der Meijden A, Vences M, Hoegg S *et al.* (2007) Nuclear gene phylogeny of narrow-mouthed toads (Family: Microhylidae) and a discussion of competing hypotheses concerning their biogeographical origins. *Molecular Phylogenetics and Evolution*, 44, 1017–1030.
- Roelants K, Gower DJ, Wilkinson M *et al.* (2007) Global patterns of diversification in the history of modern amphibians. *Proceedings of the National Academy of Sciences*, 104, 887–892.
- San Mauro D, Vences M, Alcobendas M, Zardoya R, Meyer A (2005) Initial diversification of living amphibians predated the breakup of Pangaea. *The American Naturalist*, 165, 590–599.
- Wiens JJ (2011) Re-evolution of lost mandibular teeth in frogs after more than 200 million years, and re-evaluating Dollo's law. *Evolution*, 65, 1283–1296.
- Zhang P, Liang D, Mao R-L *et al.* (2013) Efficient sequencing of anuran mtDNAs and a mitogenomic exploration of the phylogeny and evolution of frogs. *Molecular Biology and Evolution*, 30, 1899–1915.
