# Supplementary material
Source: PubMed Central journal article supplement (PMC5530686)
Supplement: pnas.1704632114.sfig11.pdf [file pnas.1704632114.sfig11.pdf]

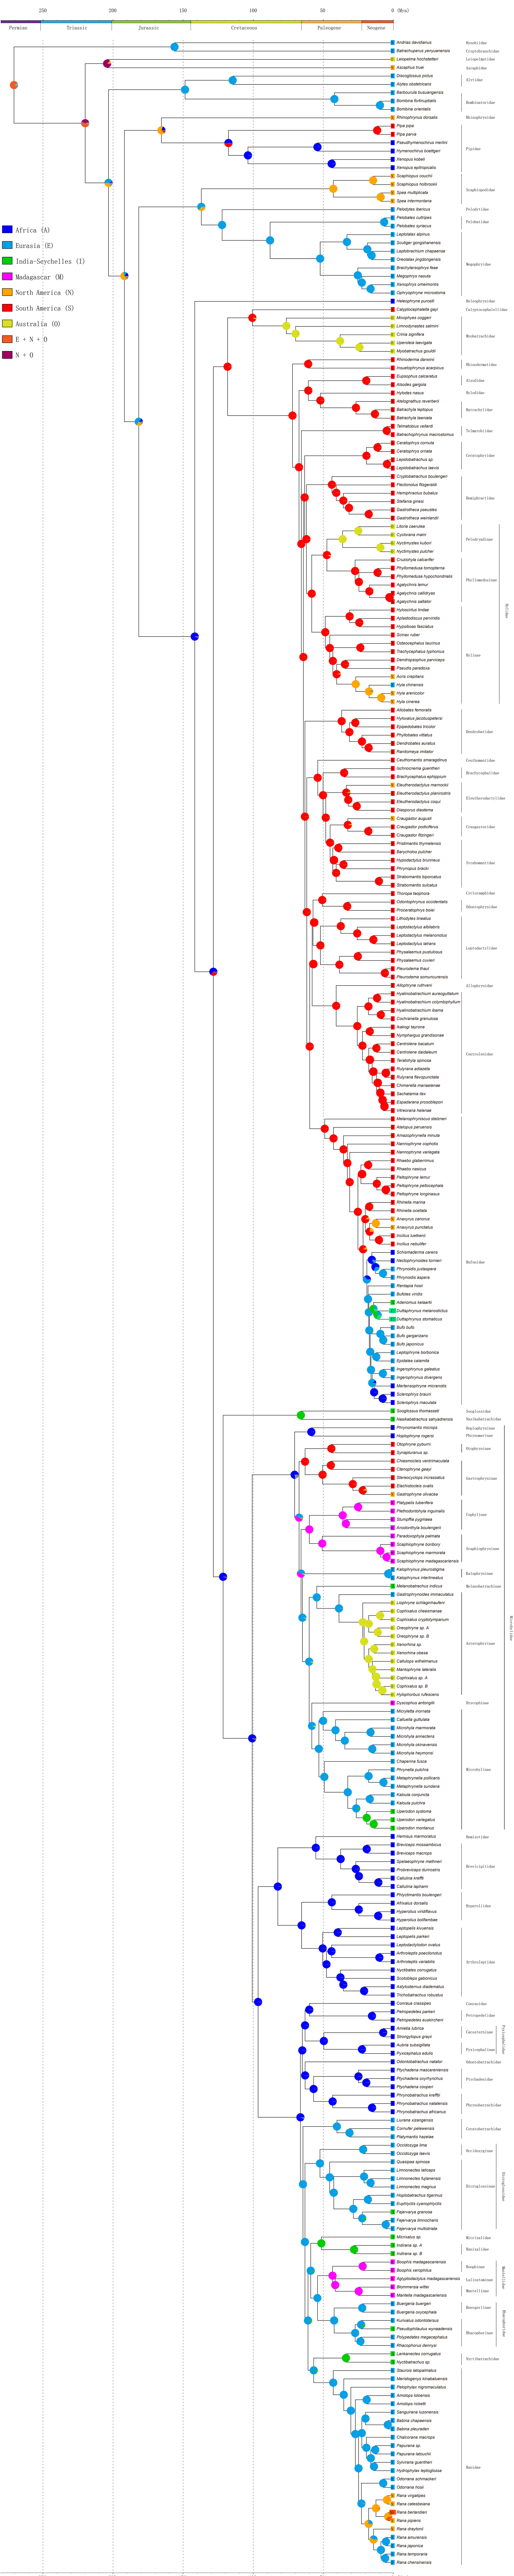

- Africa (A)
- Eurasia (E)
- India-Seychelles (I)
- Madagascar (M)
- North America (N)
- South America (S)
- Australia (O)
- E + N + O
- N + O
