# Supplementary material
Source: PubMed Central journal article supplement (PMC5530686)

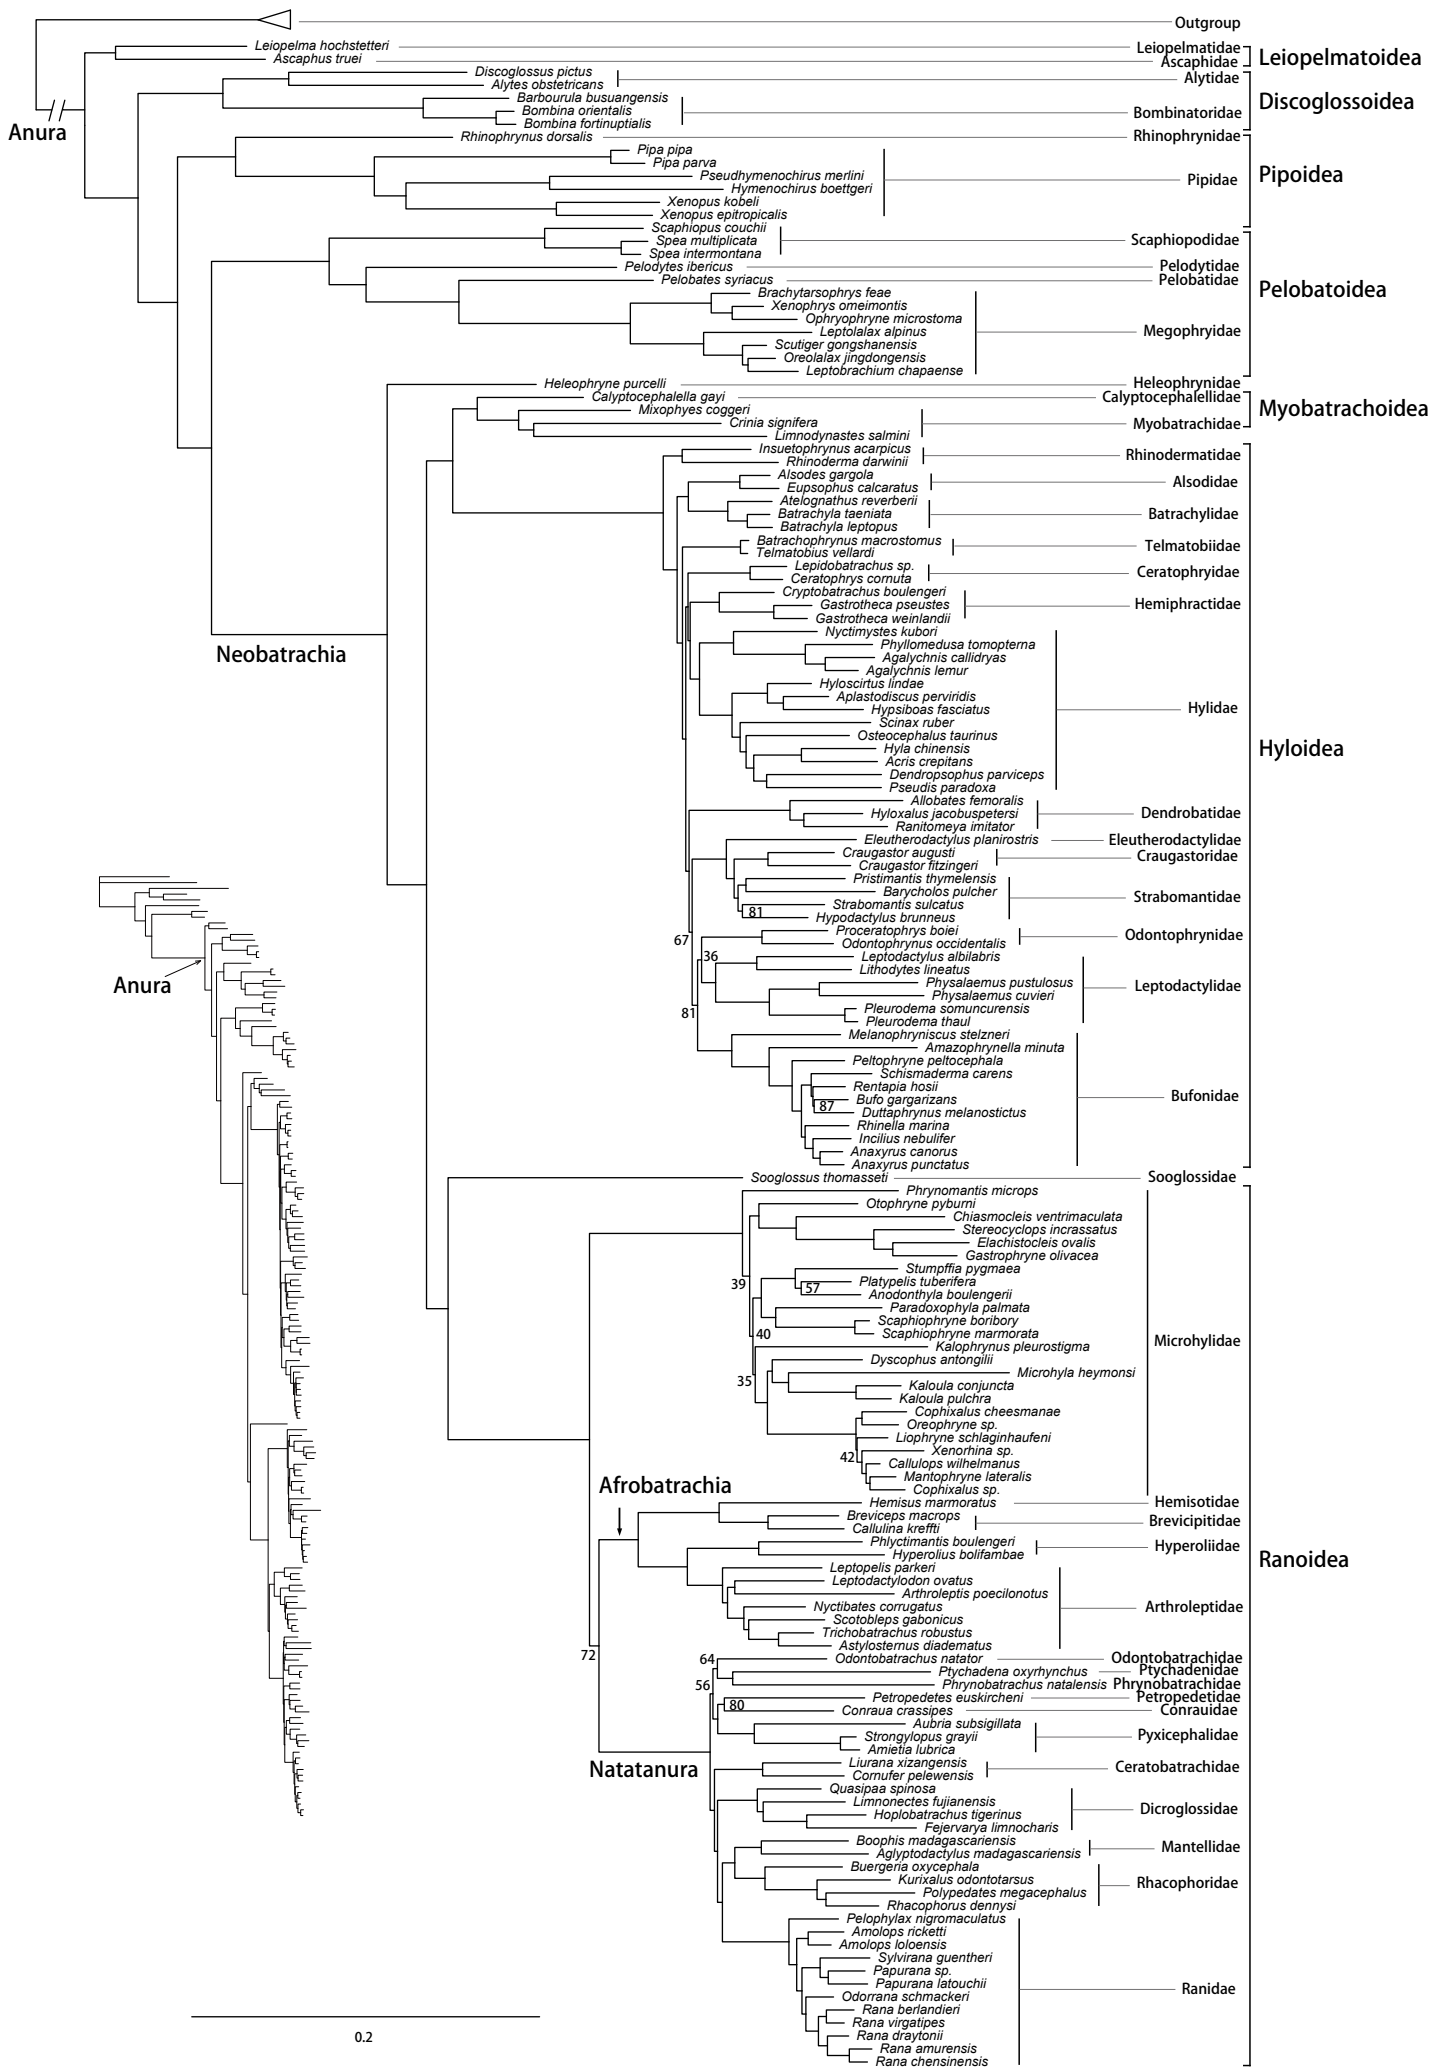

Supplement: pnas.1704632114.sfig01.pdf [file pnas.1704632114.sfig01.pdf]

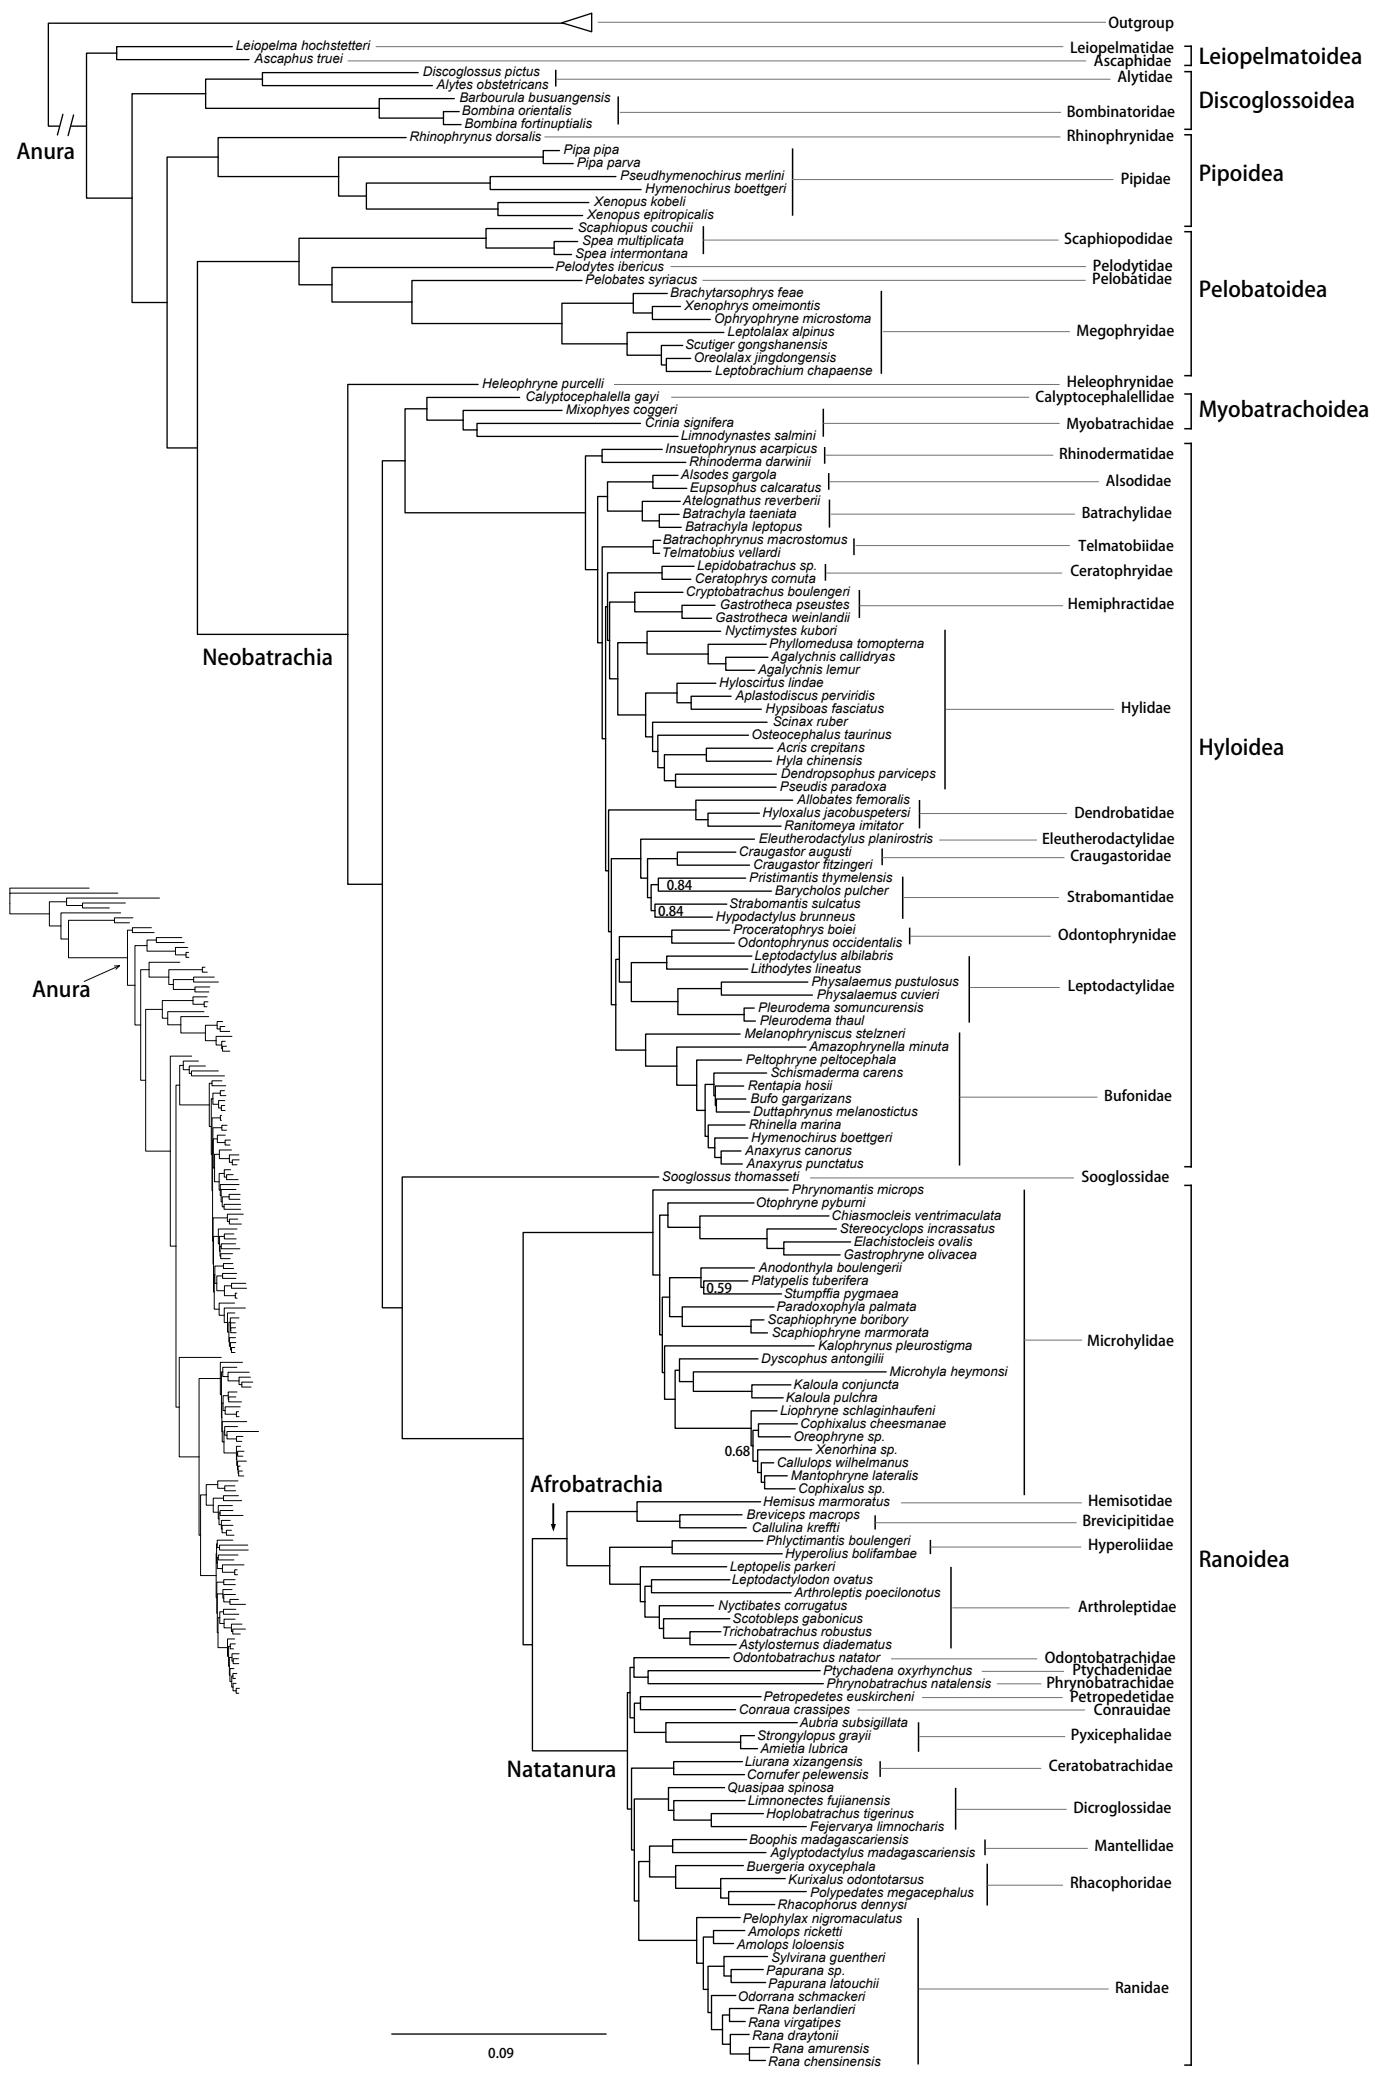

Supplement: pnas.1704632114.sfig02.pdf [file pnas.1704632114.sfig02.pdf]

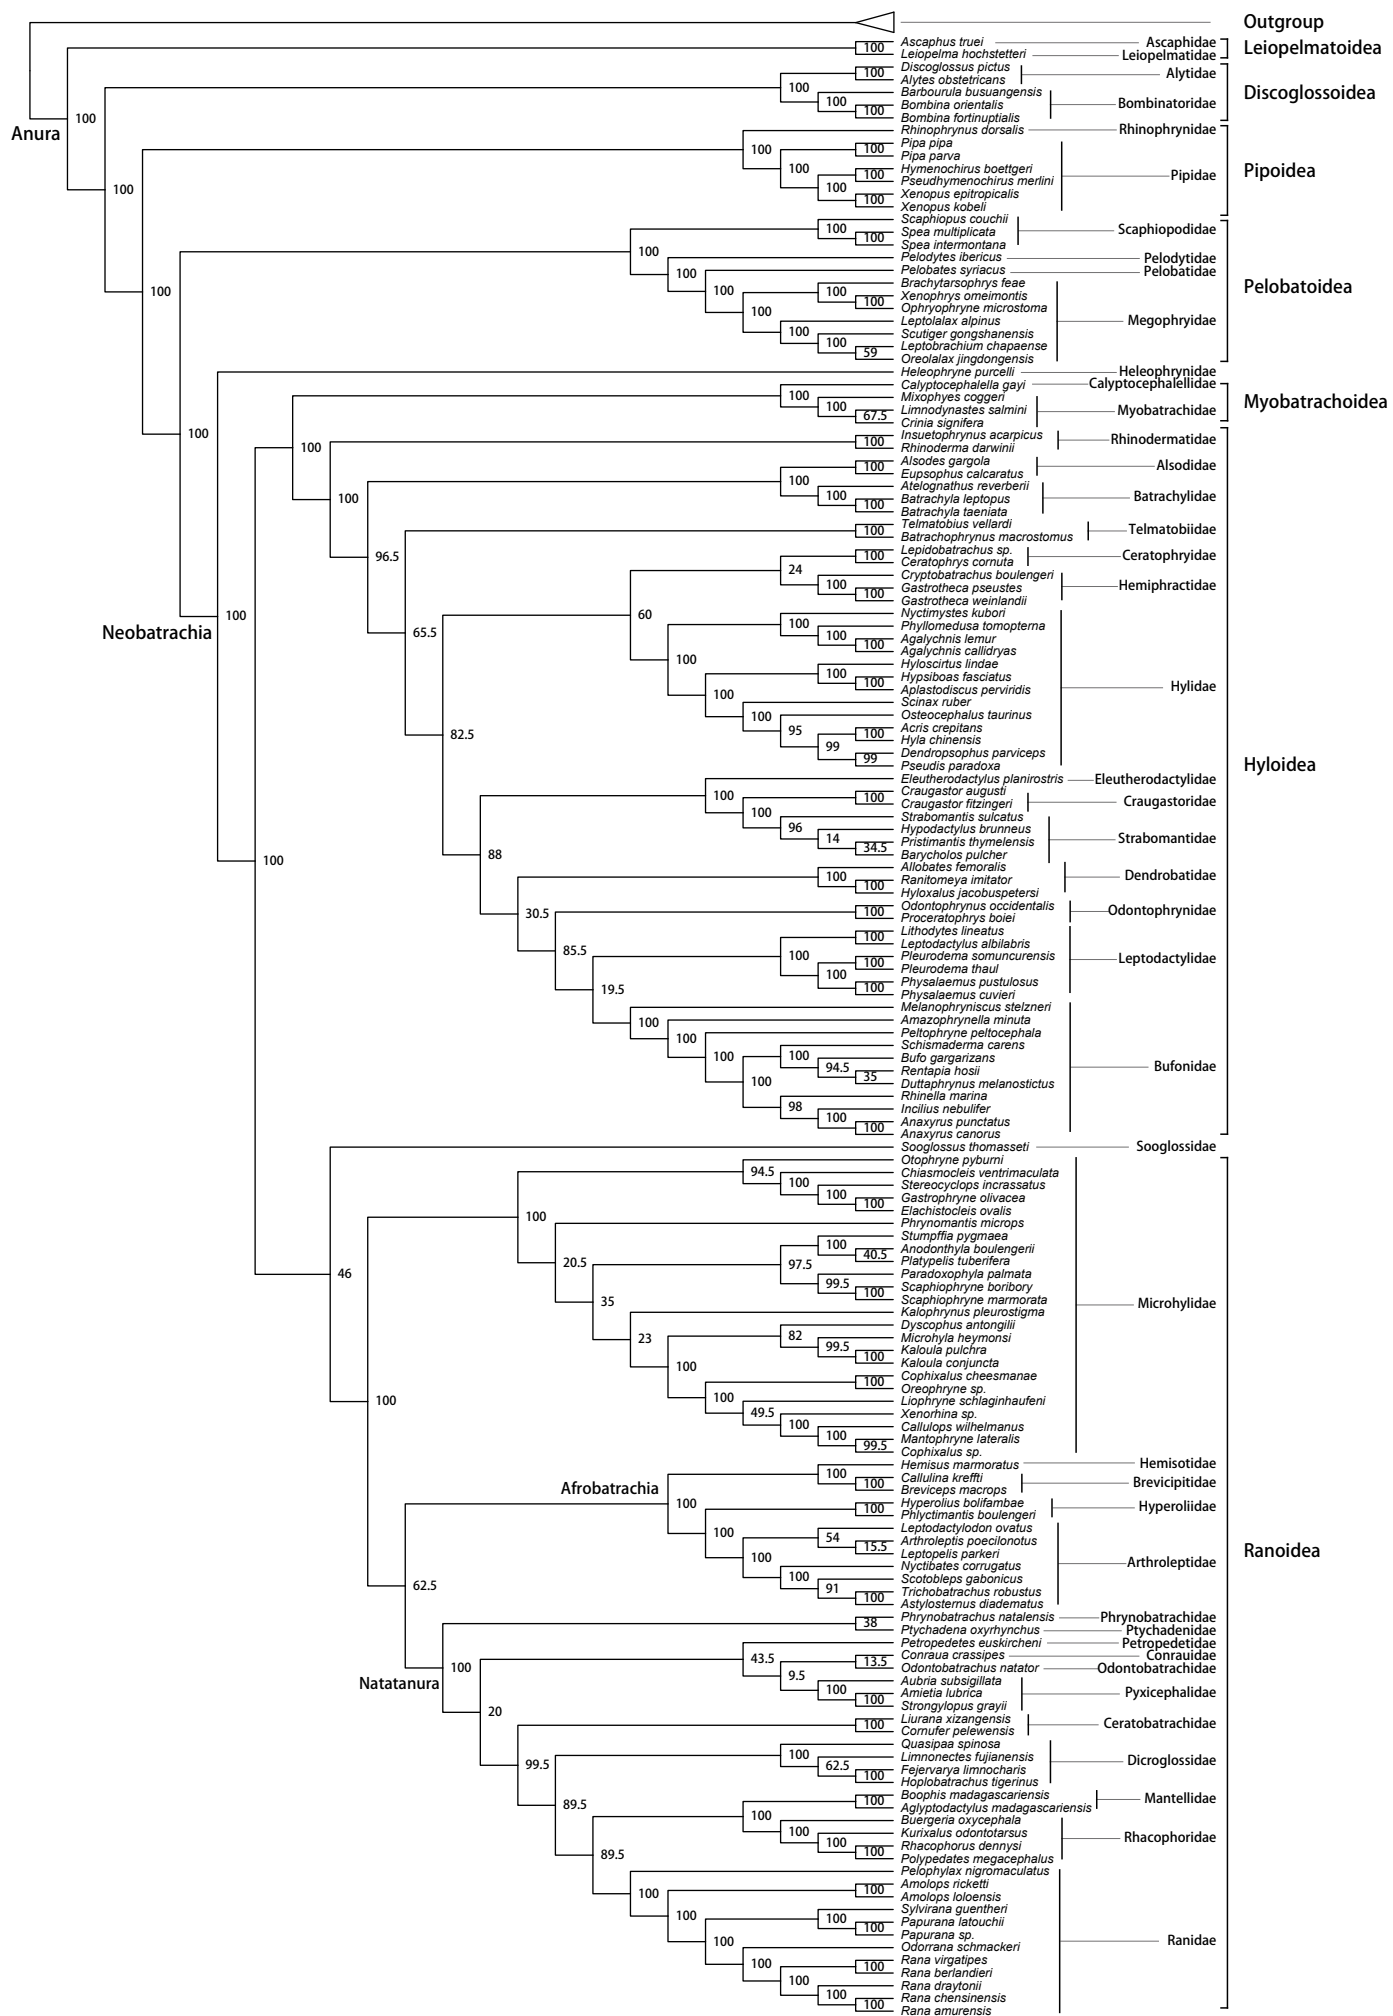

Supplement: pnas.1704632114.sfig03.pdf [file pnas.1704632114.sfig03.pdf]

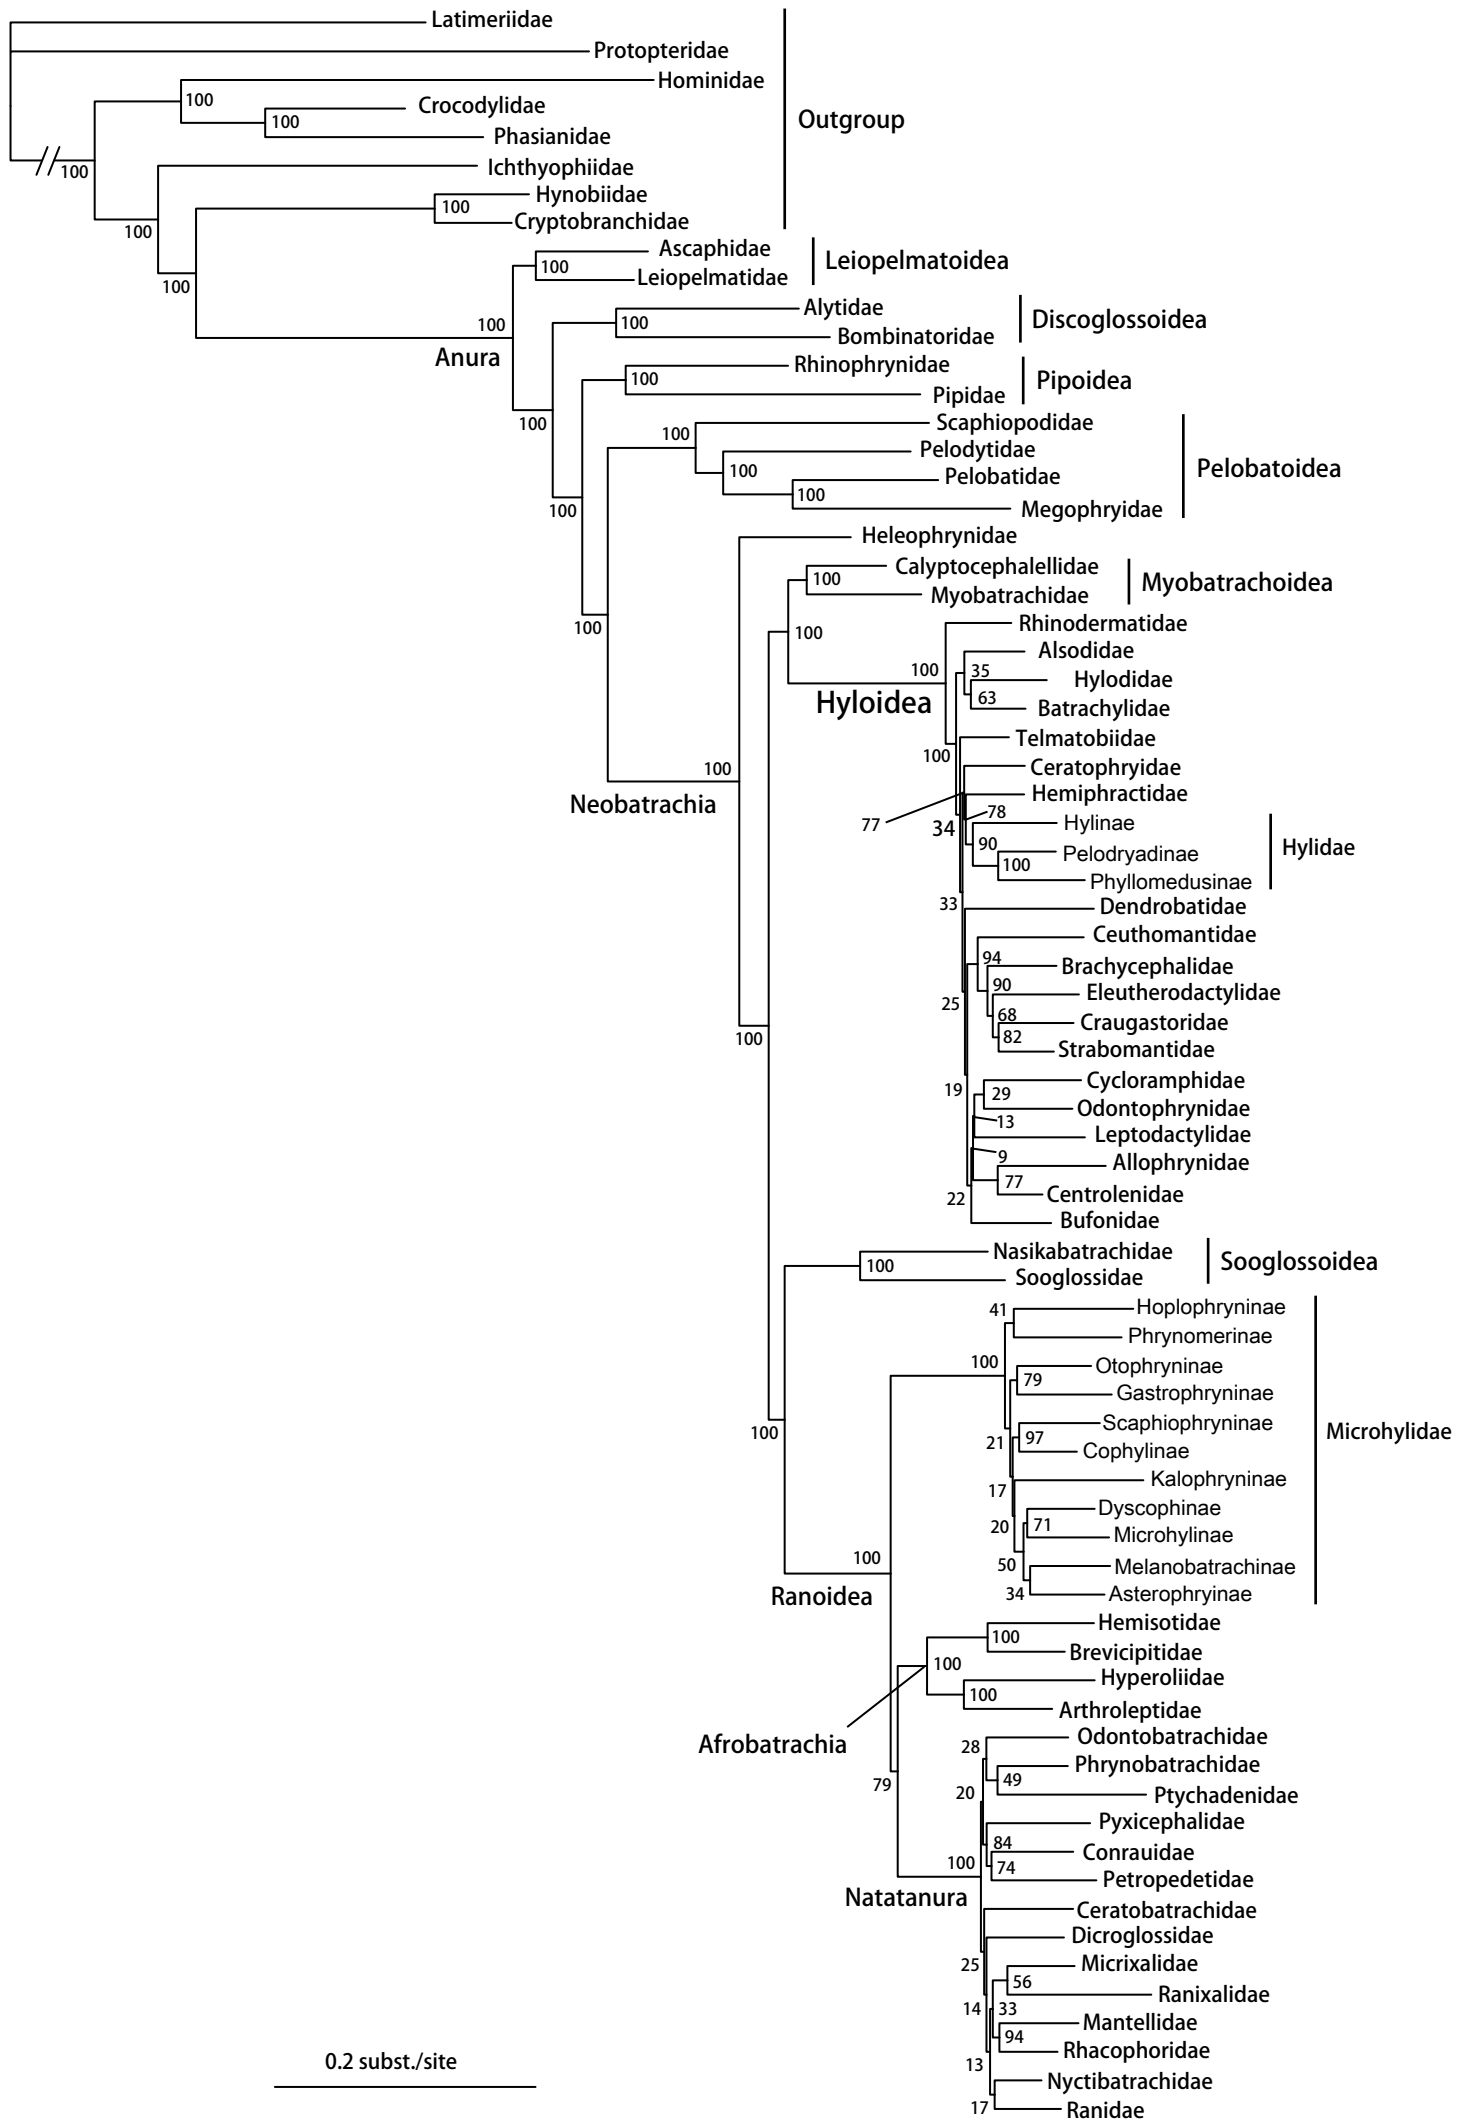

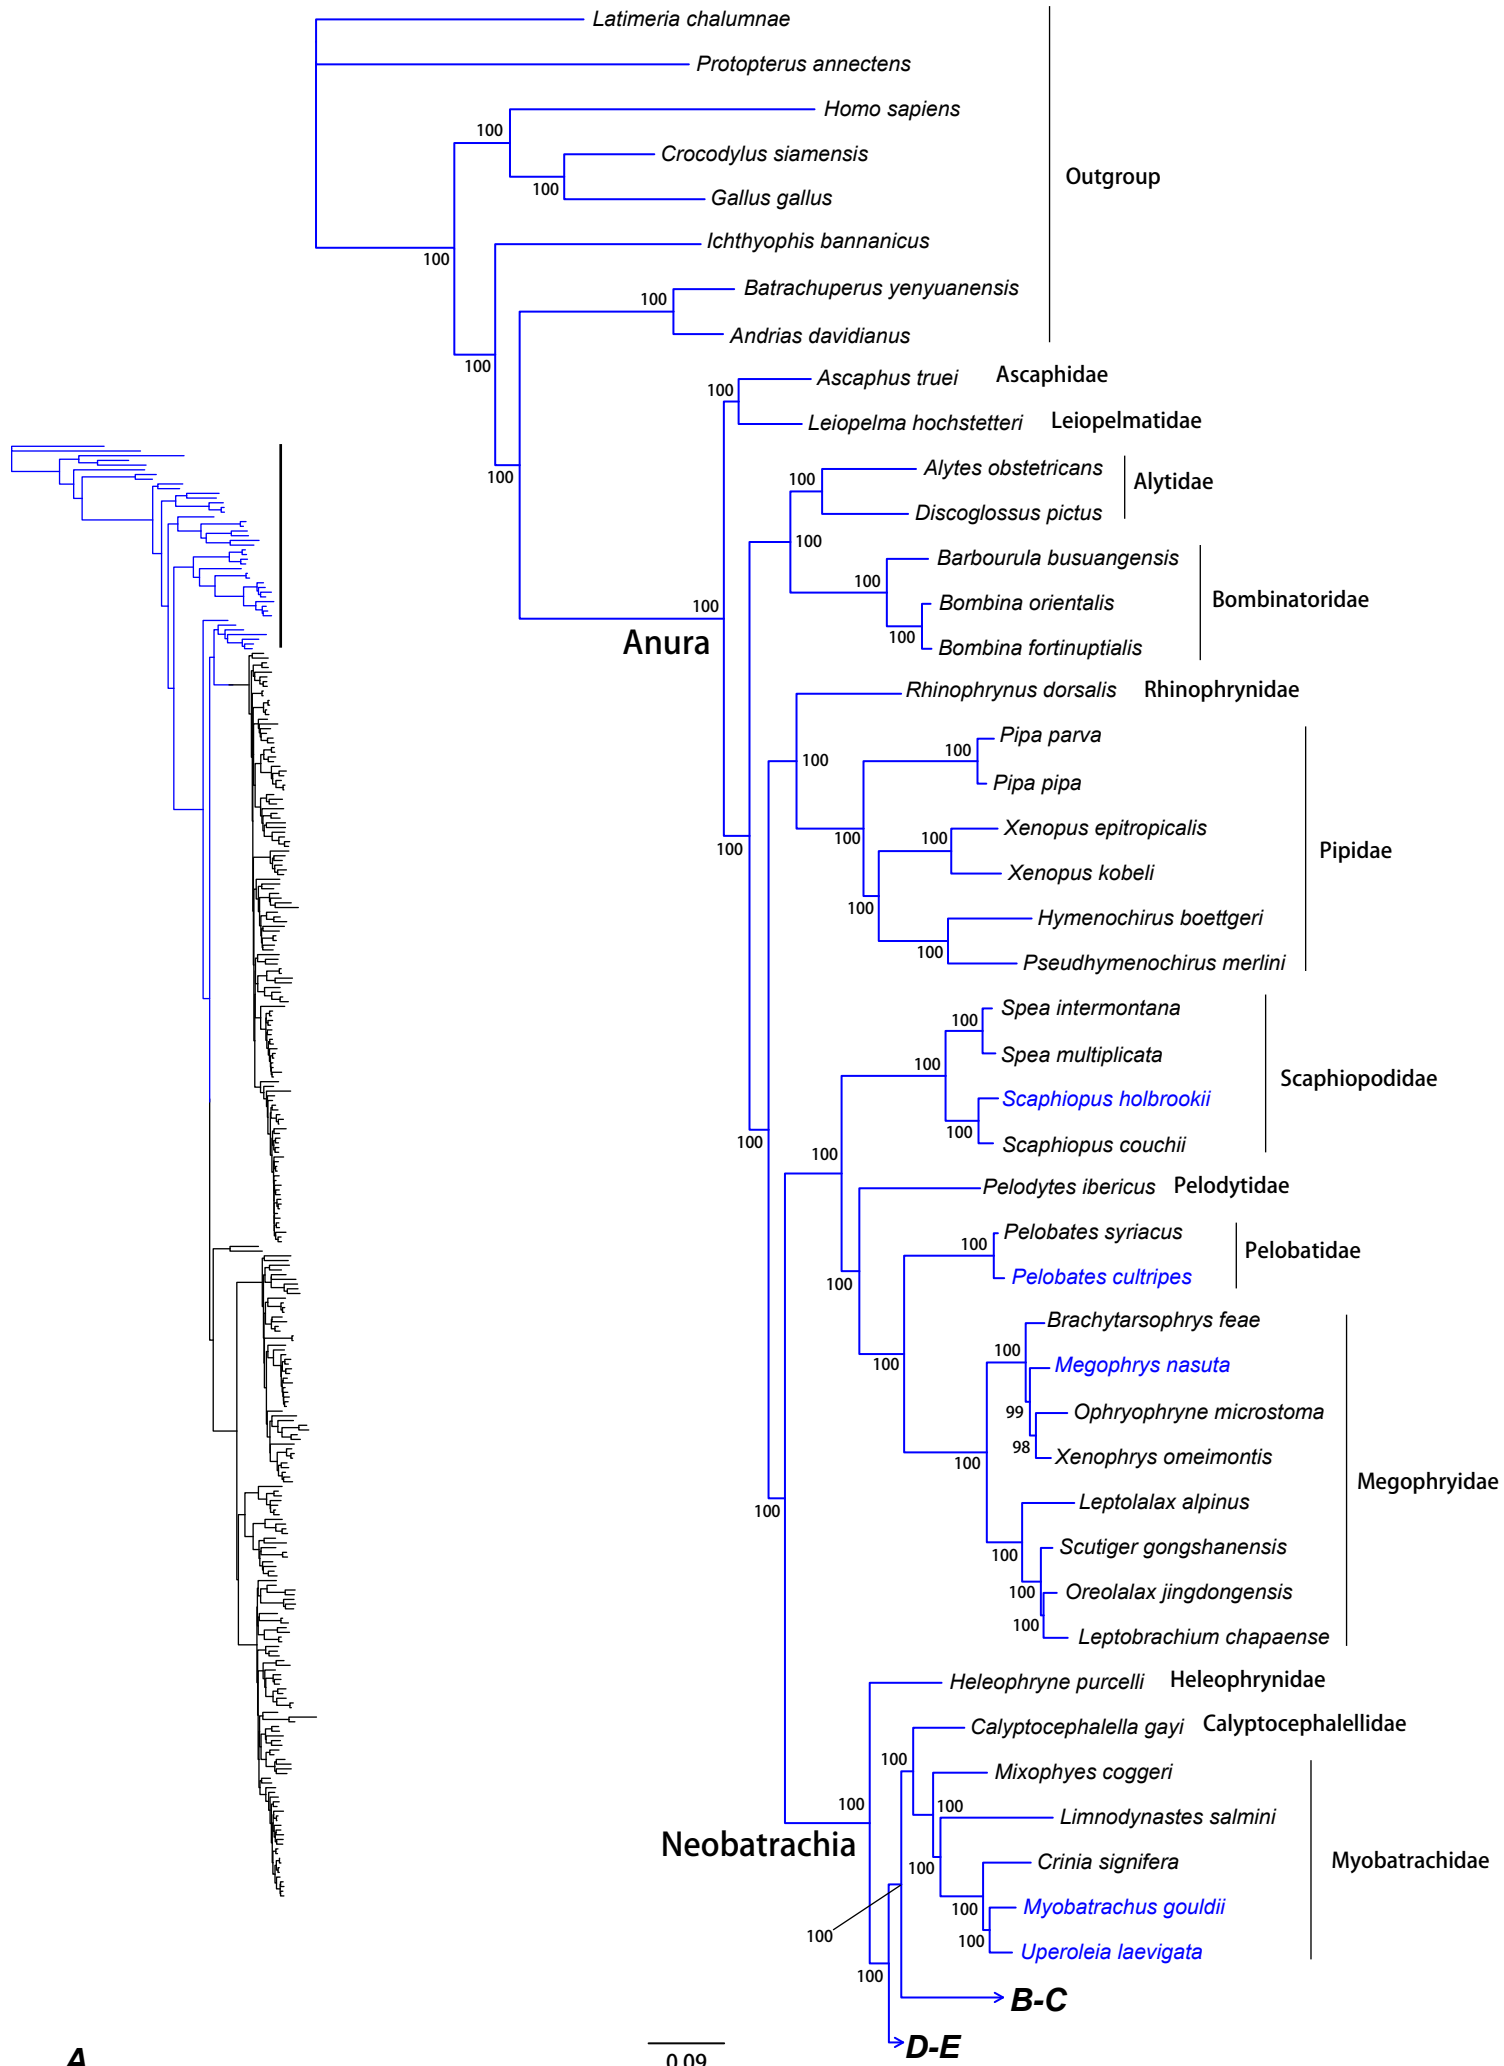

A

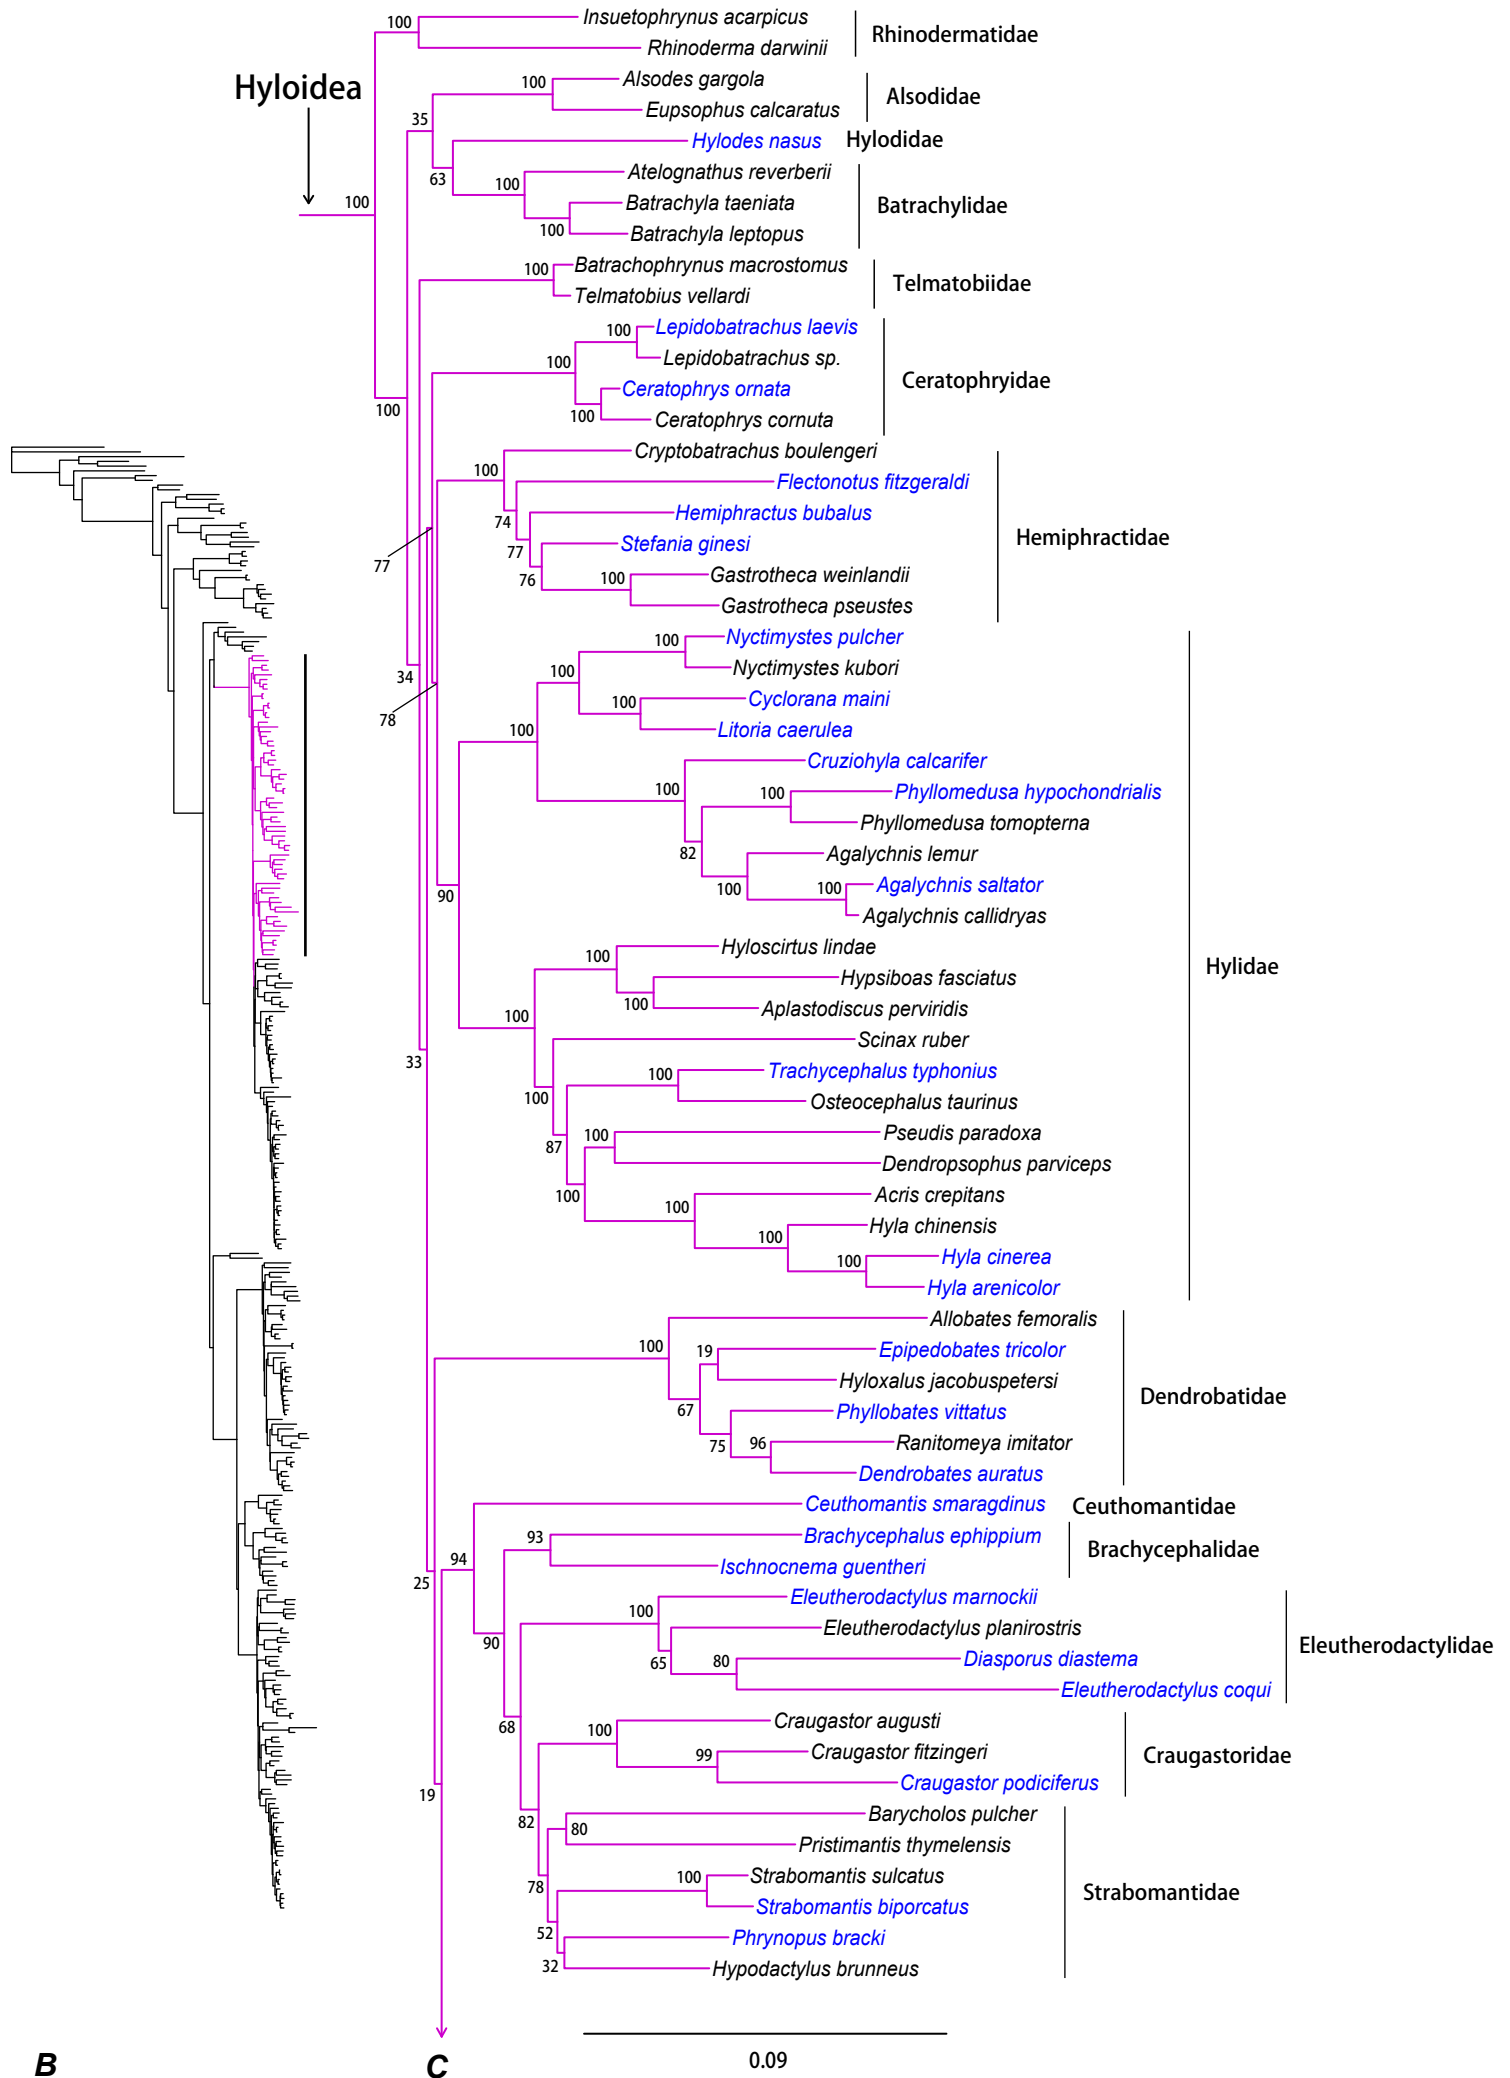

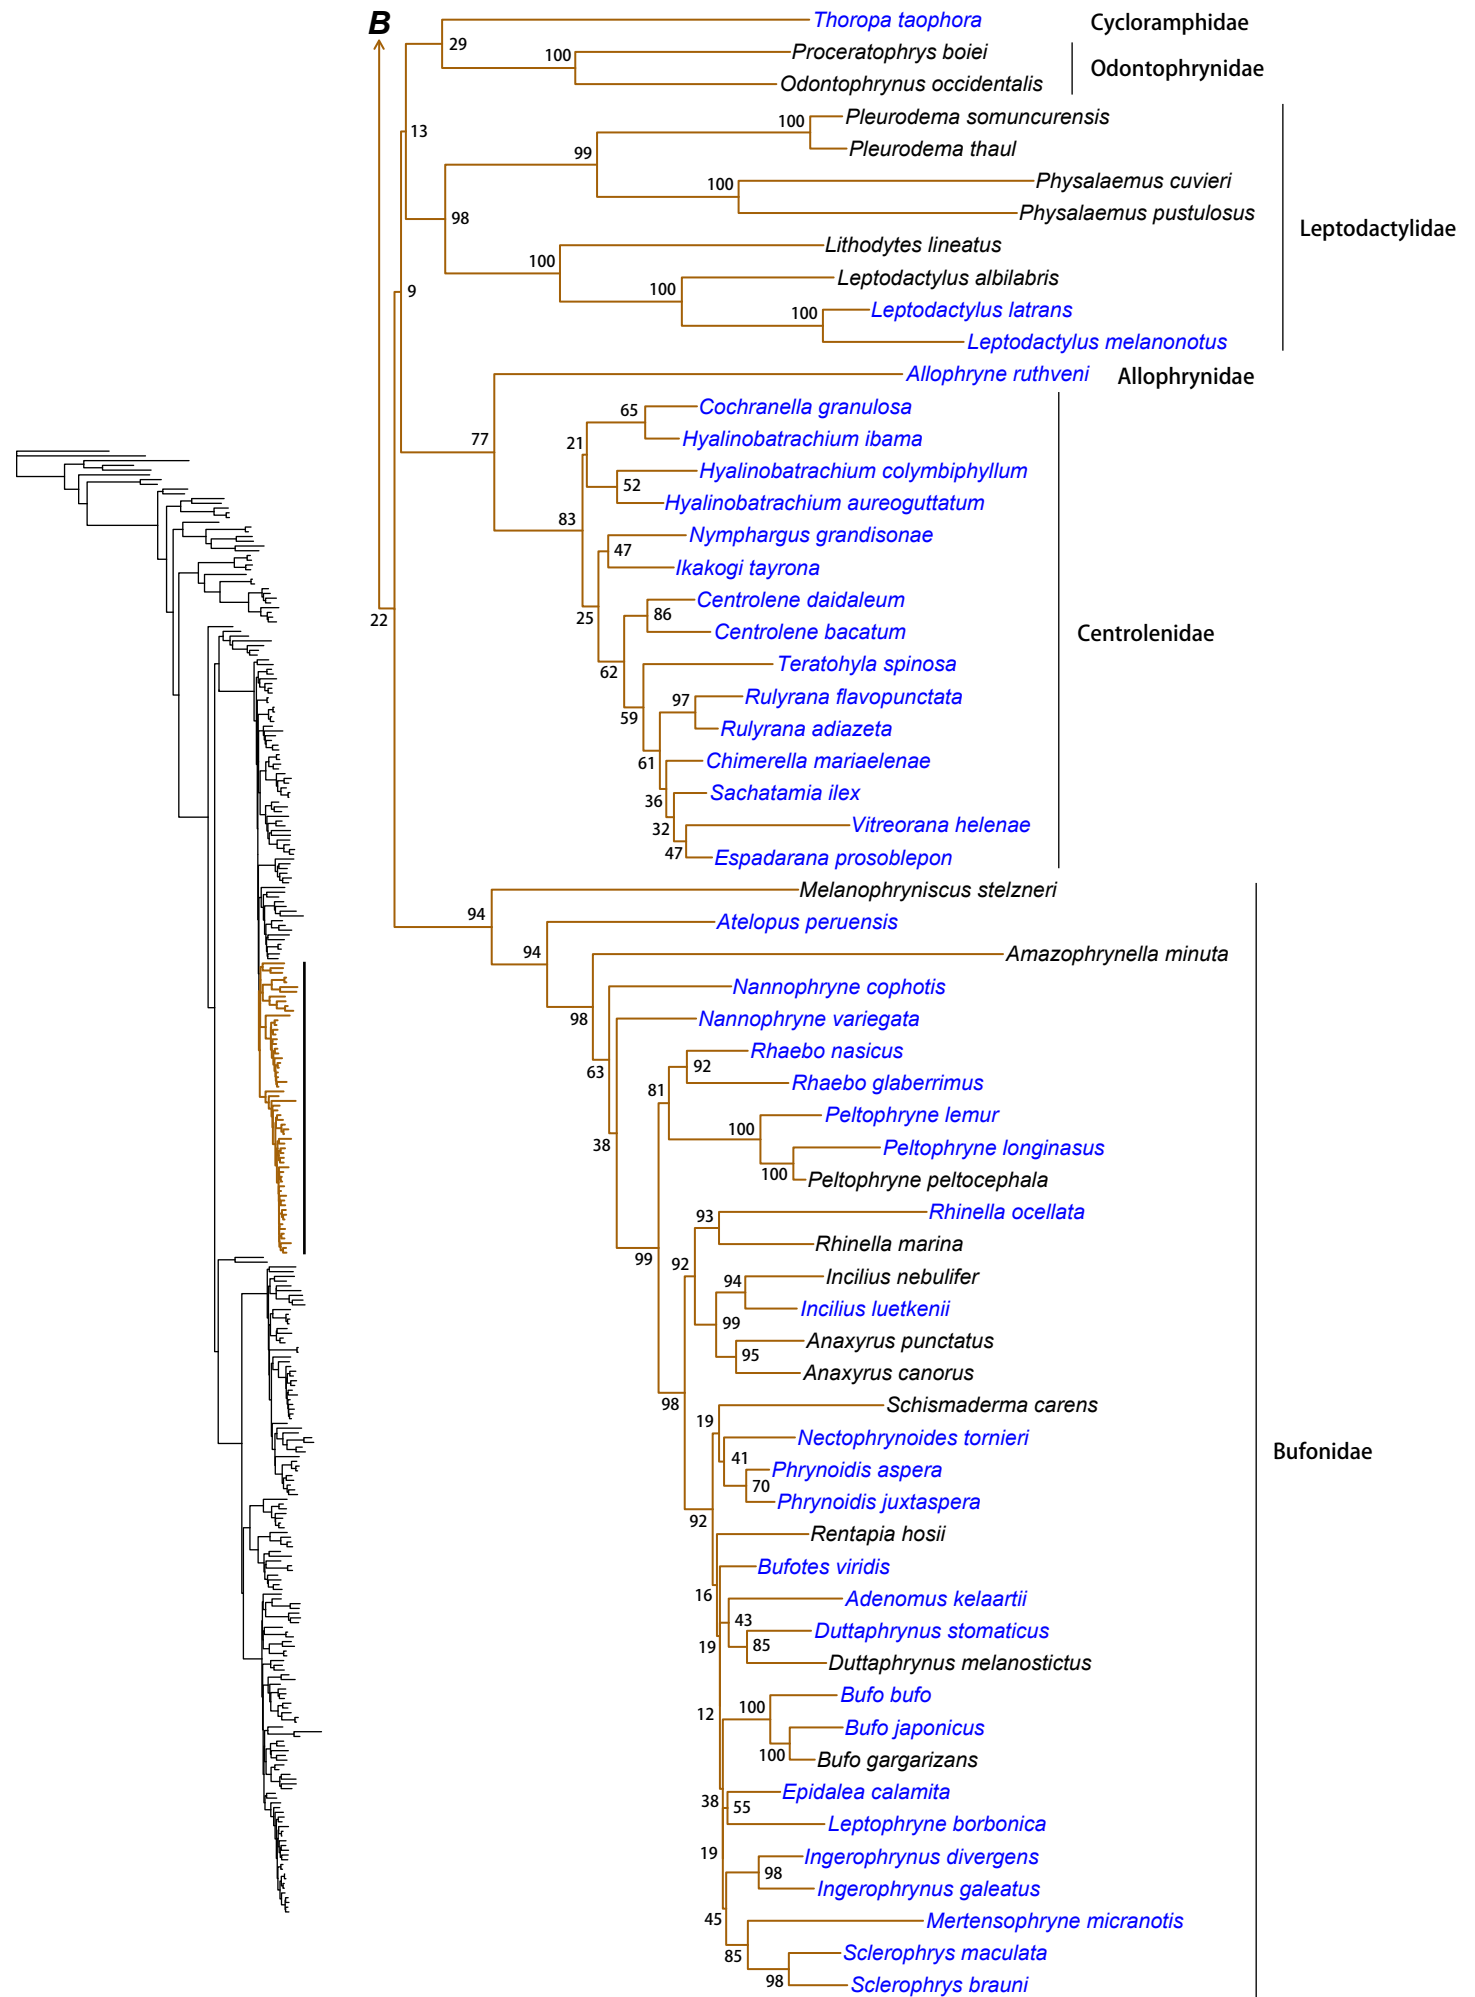

**C**

0.09

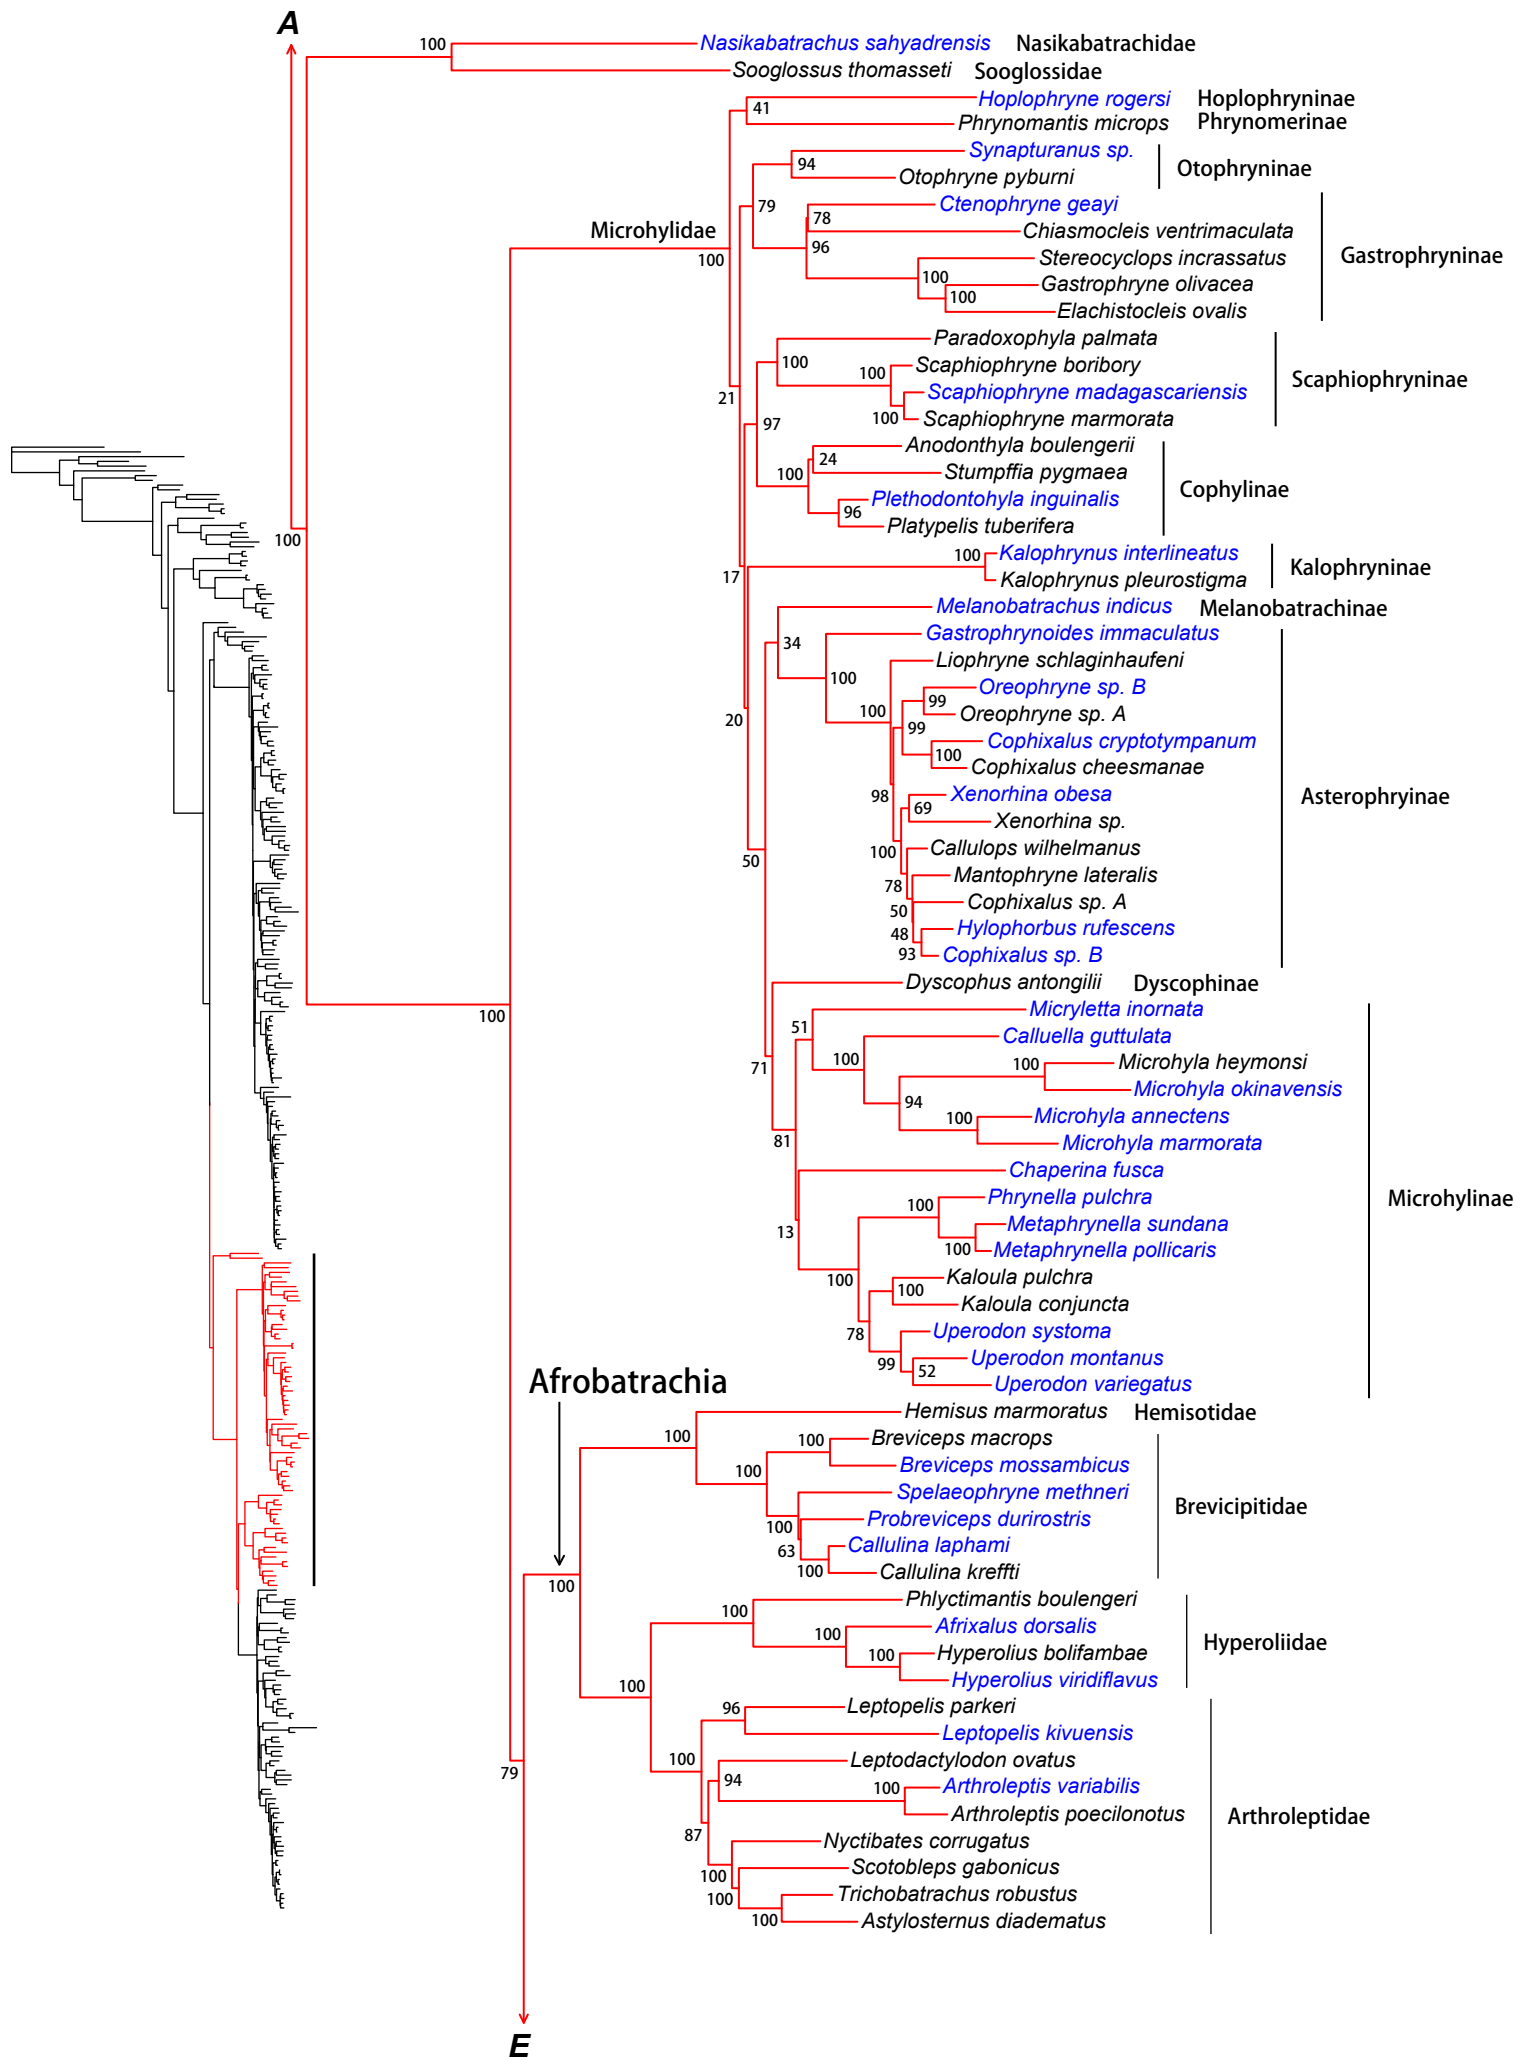

**D**

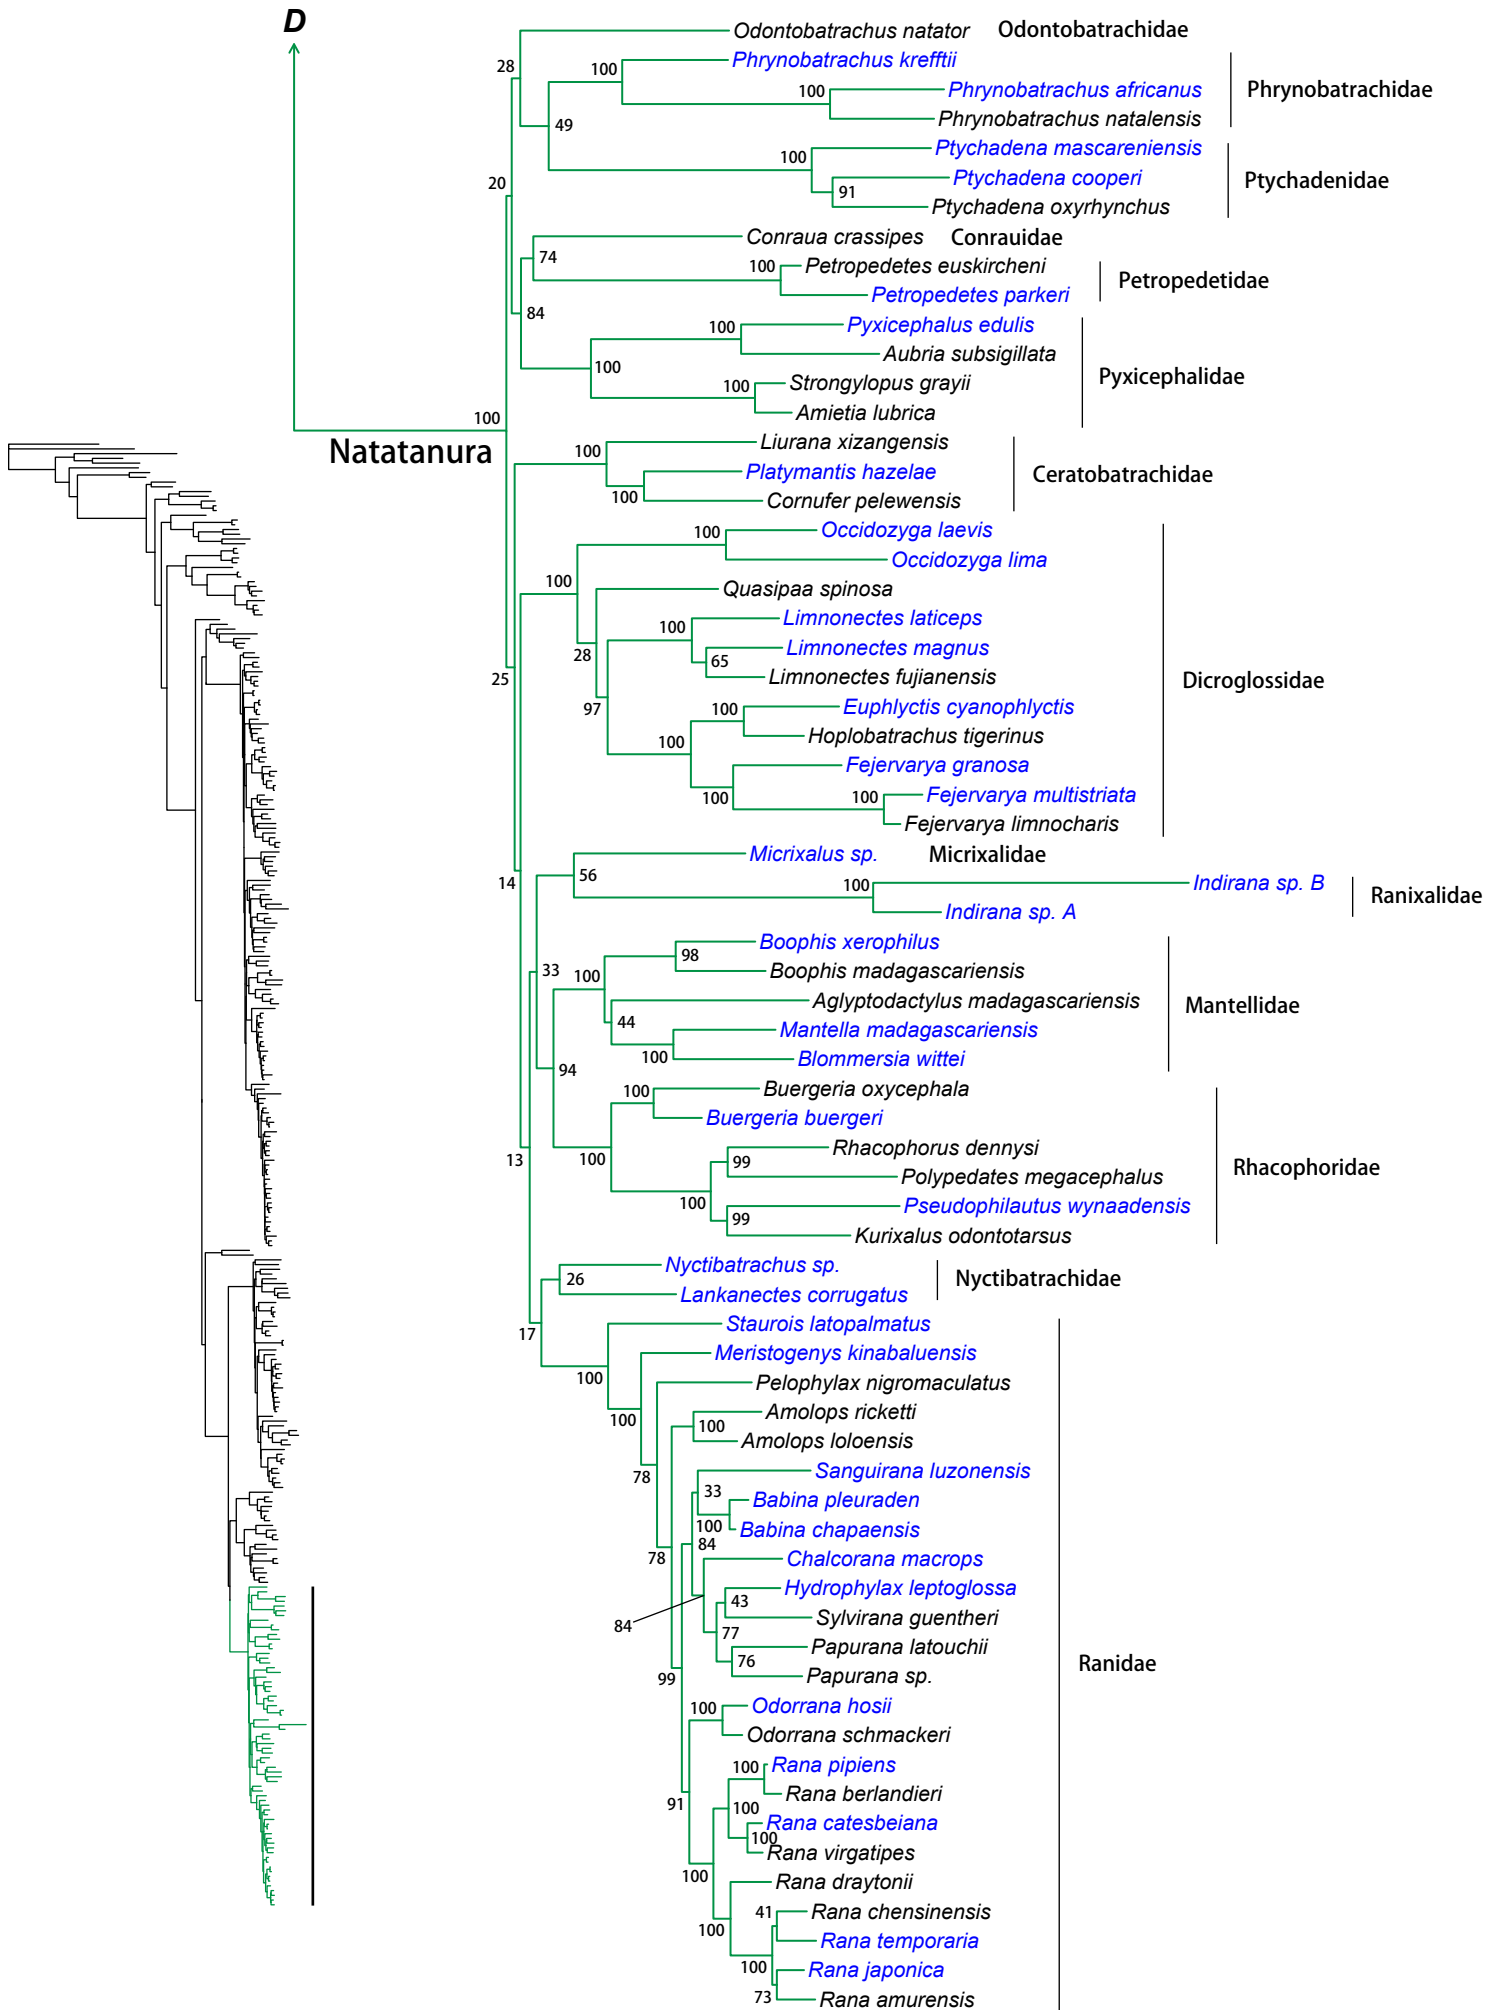

E

0.09

Supplement: pnas.1704632114.sfig04.pdf [file pnas.1704632114.sfig04.pdf]

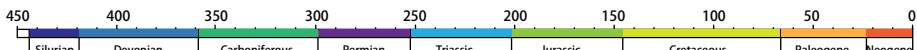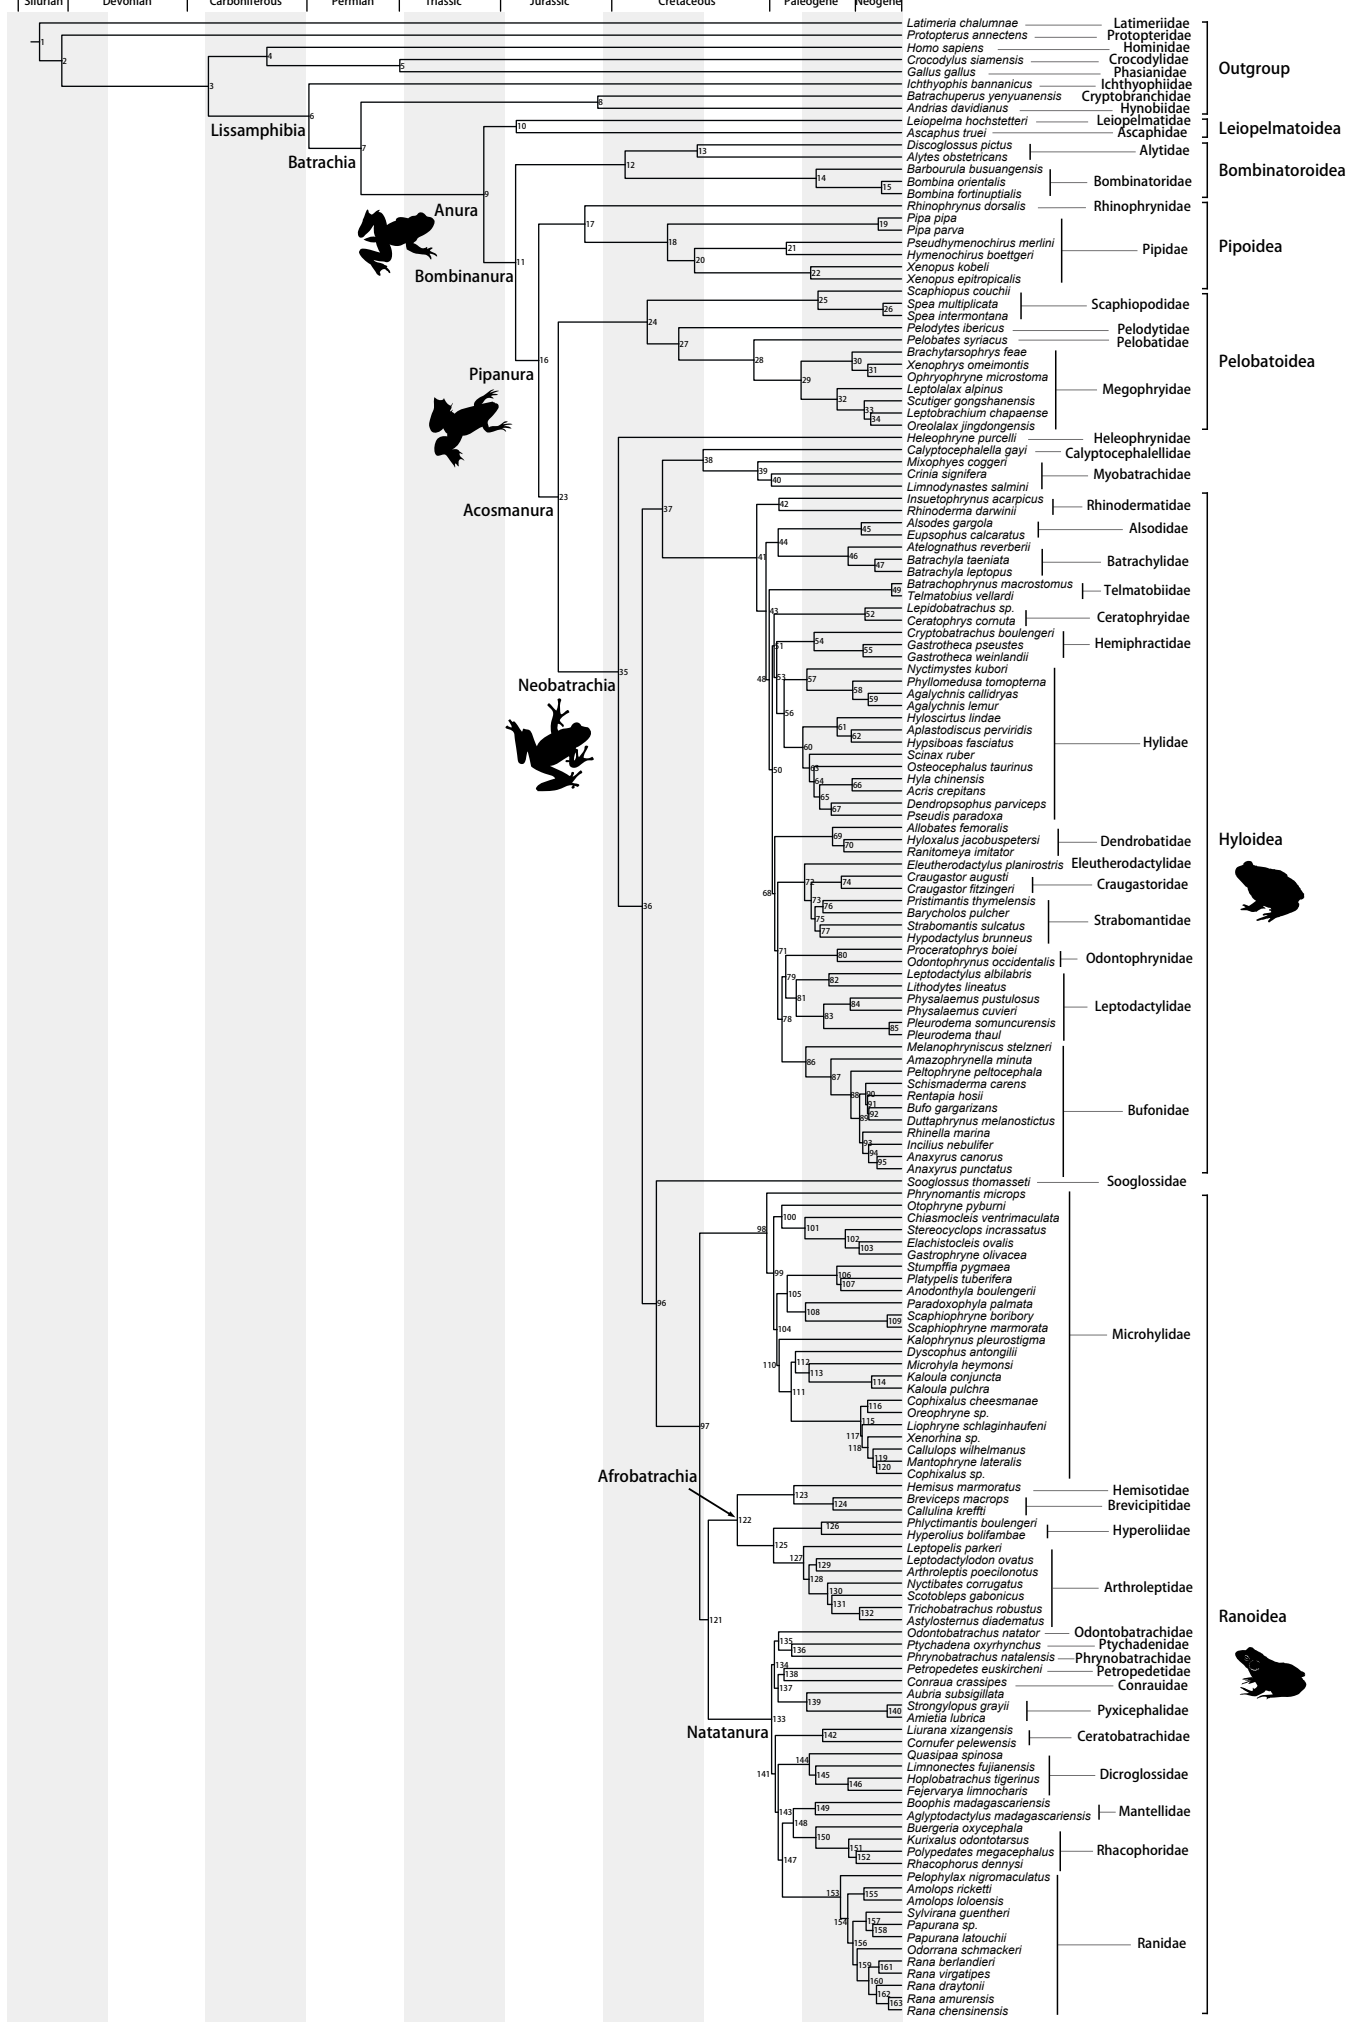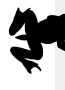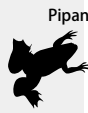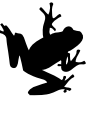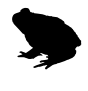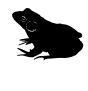

Supplement: pnas.1704632114.sfig05.pdf [file pnas.1704632114.sfig05.pdf]

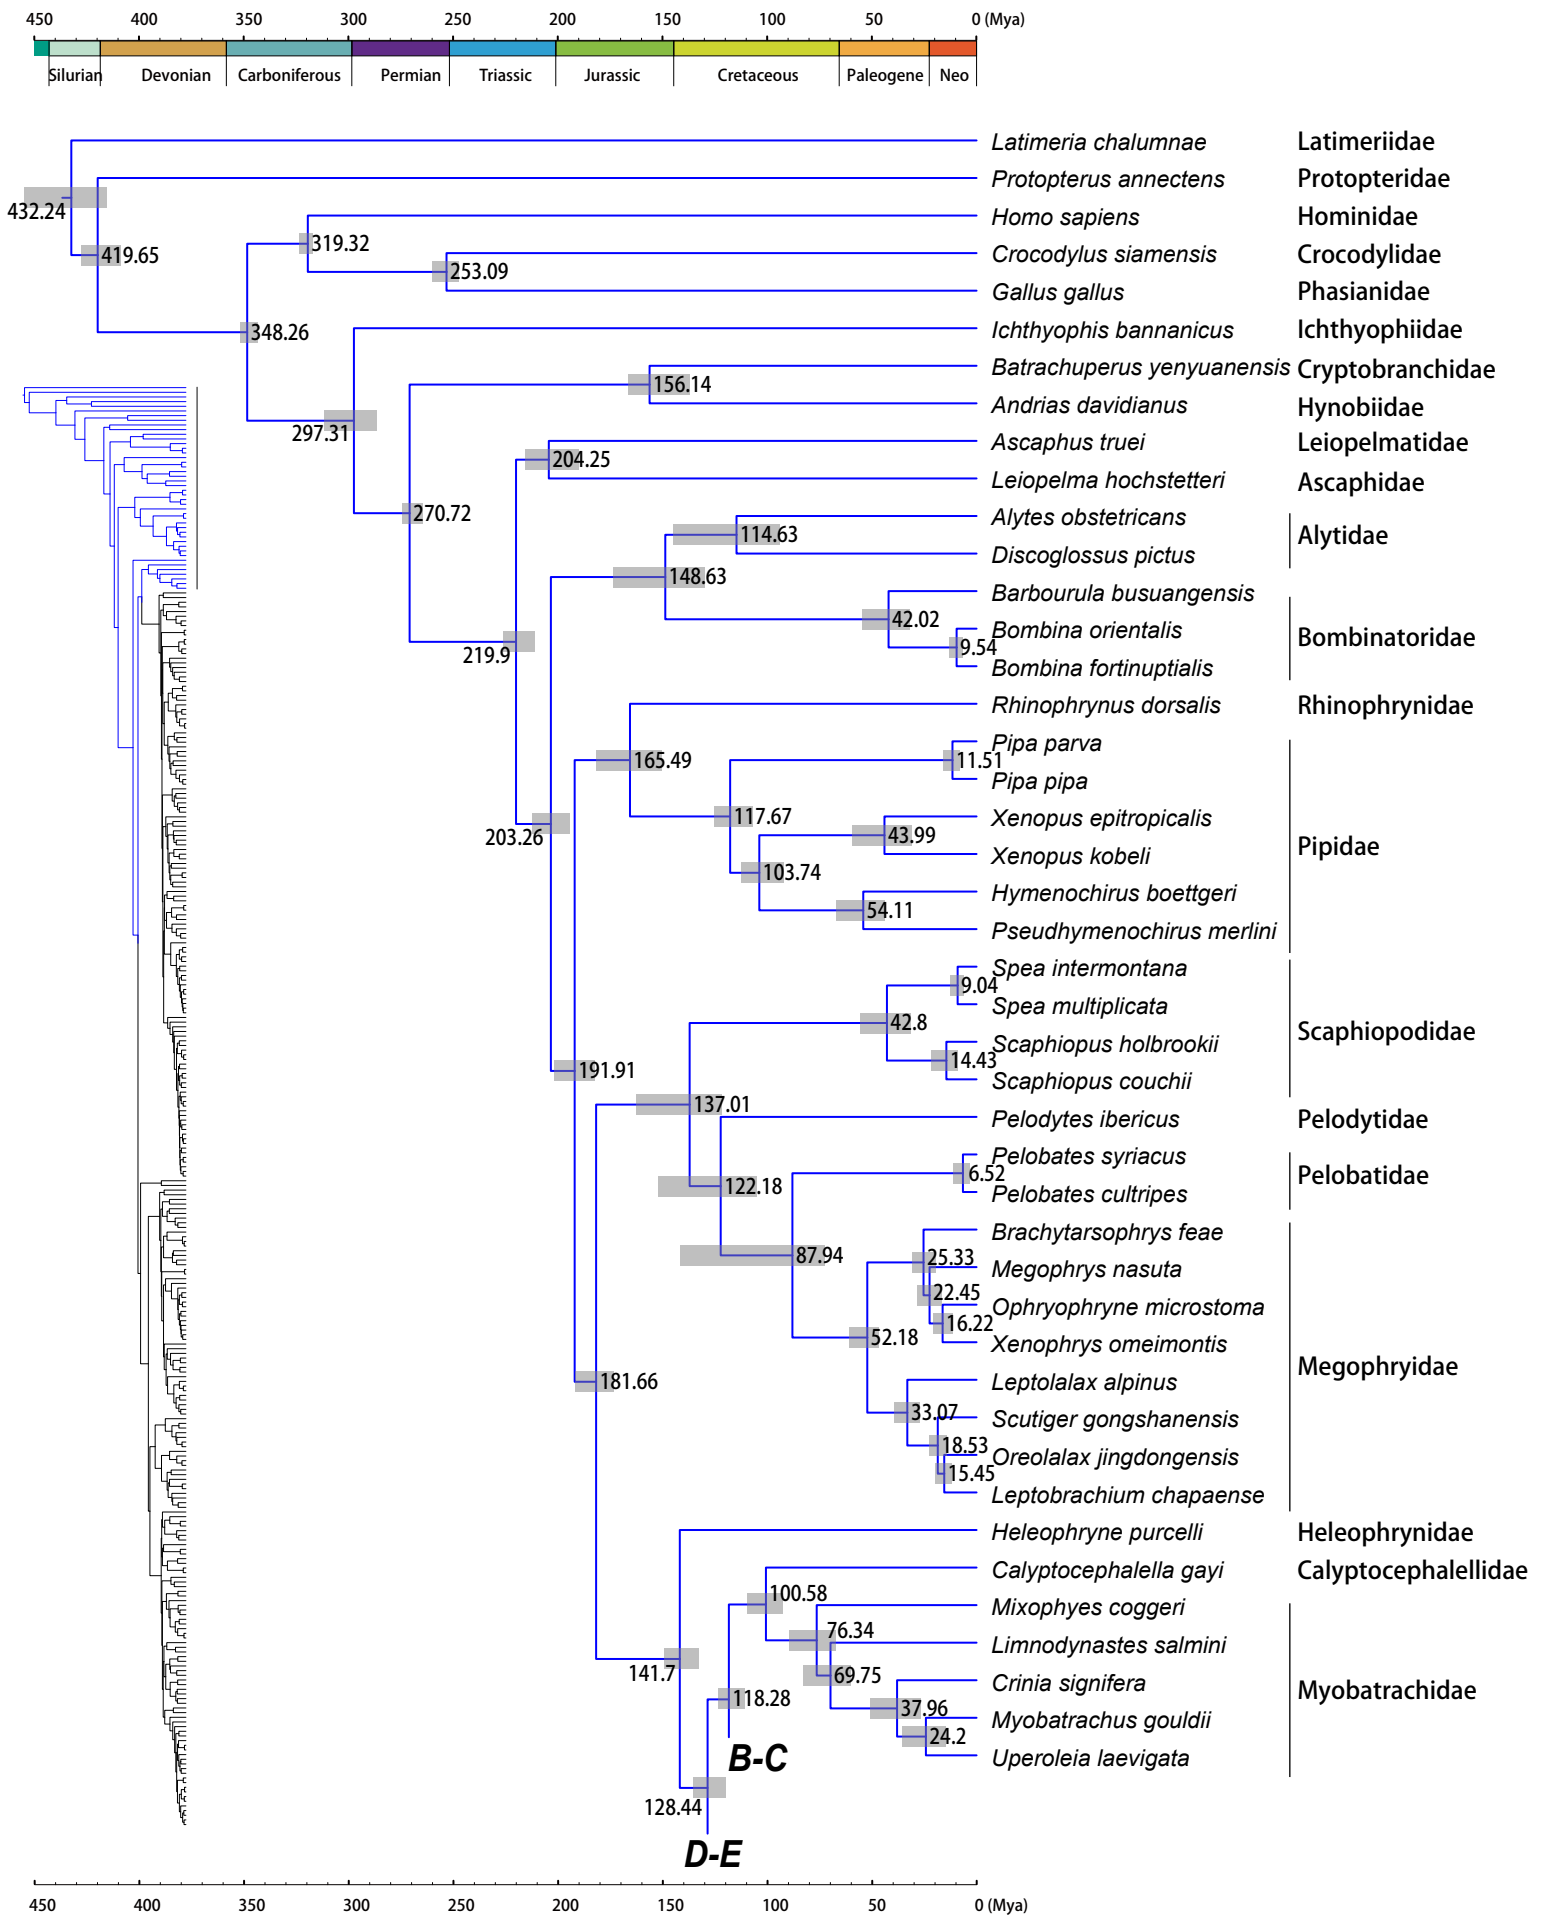

A

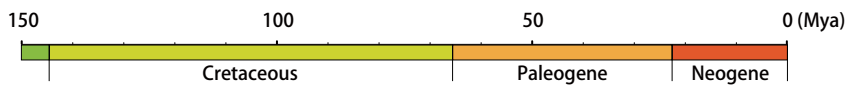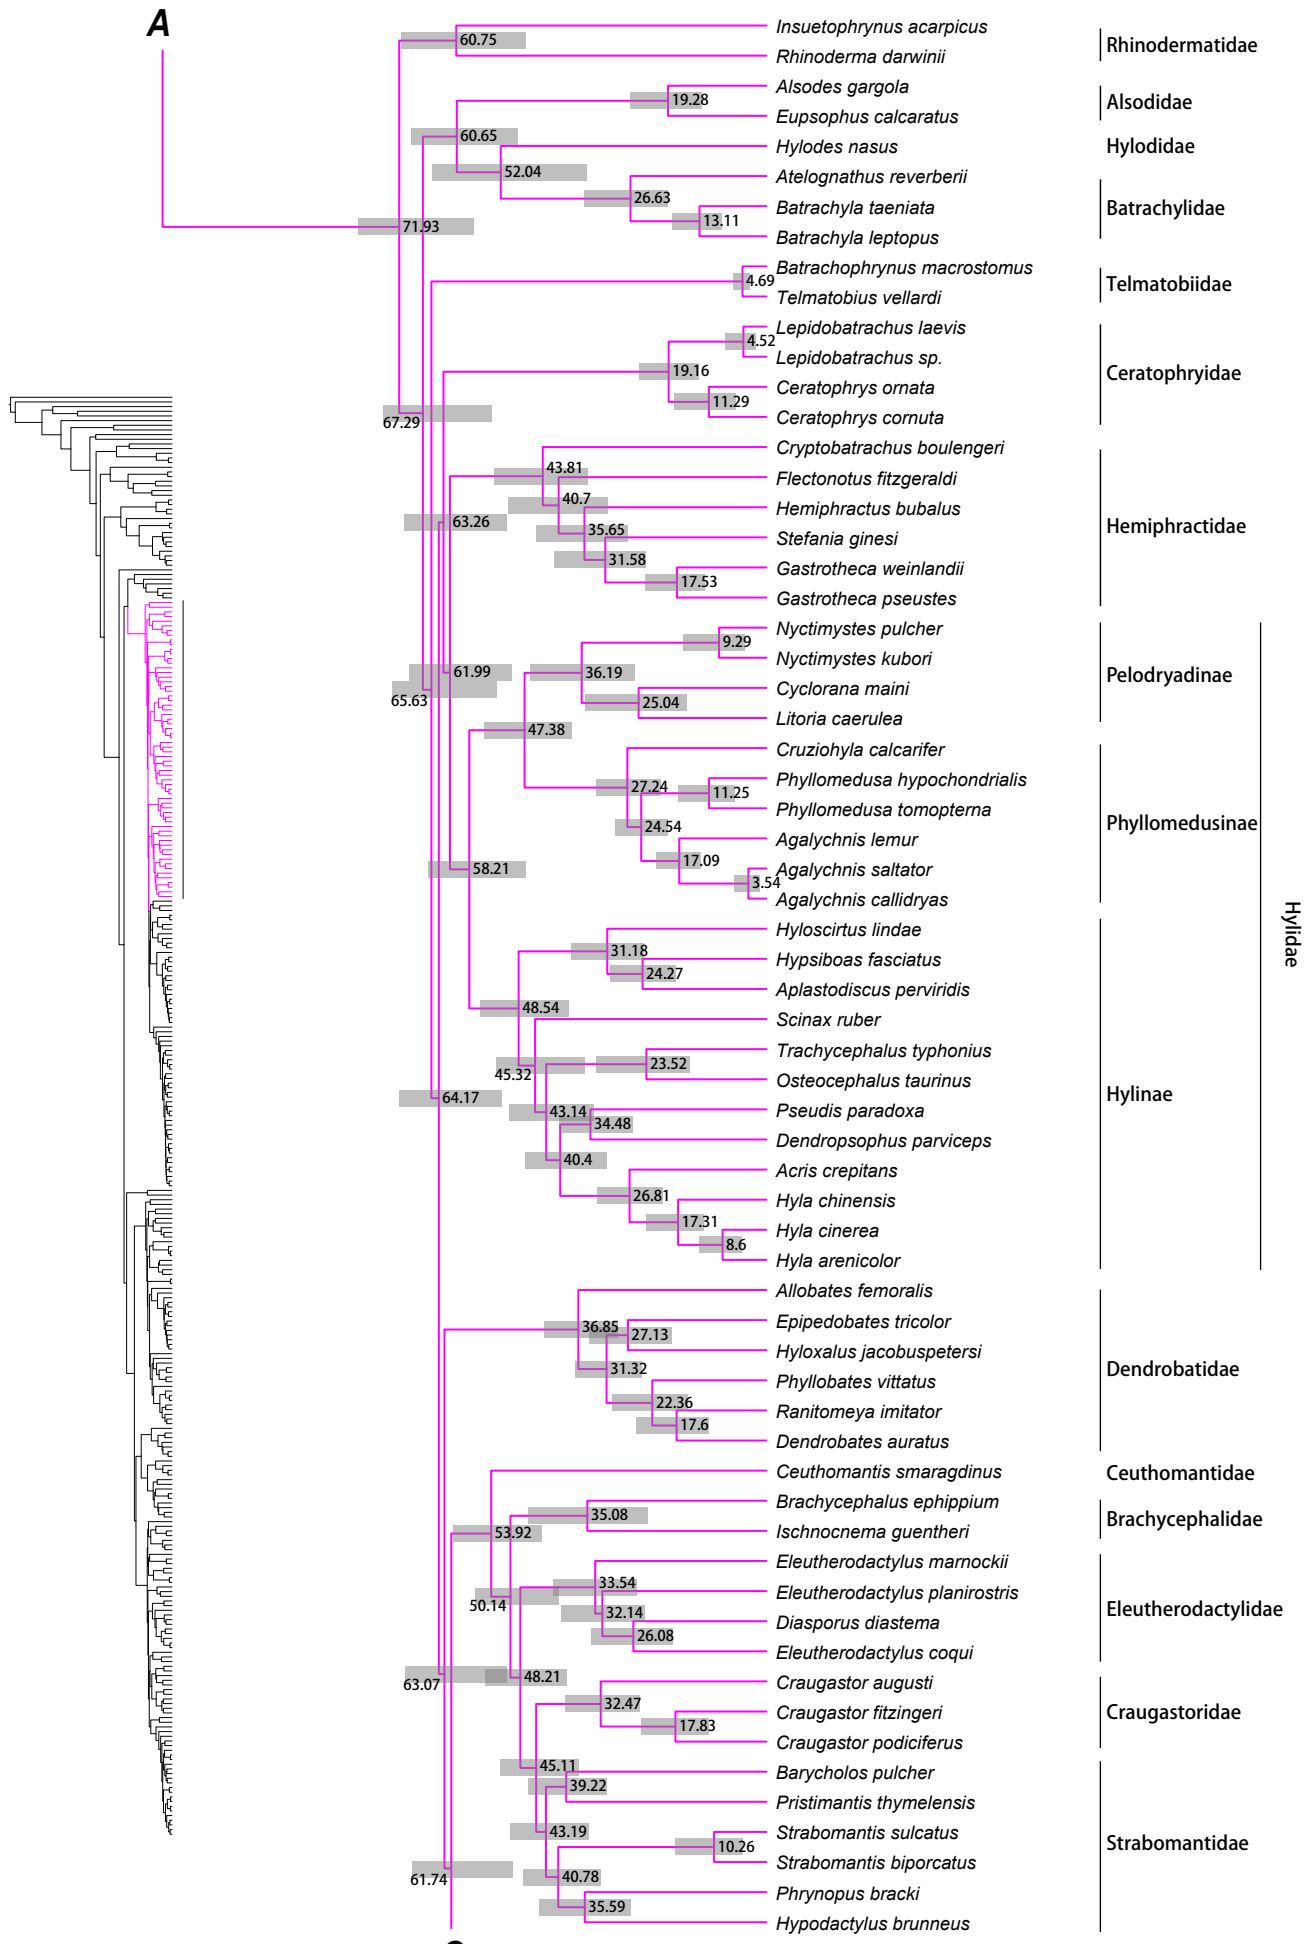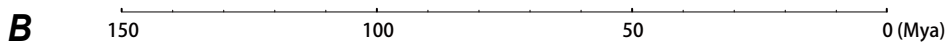

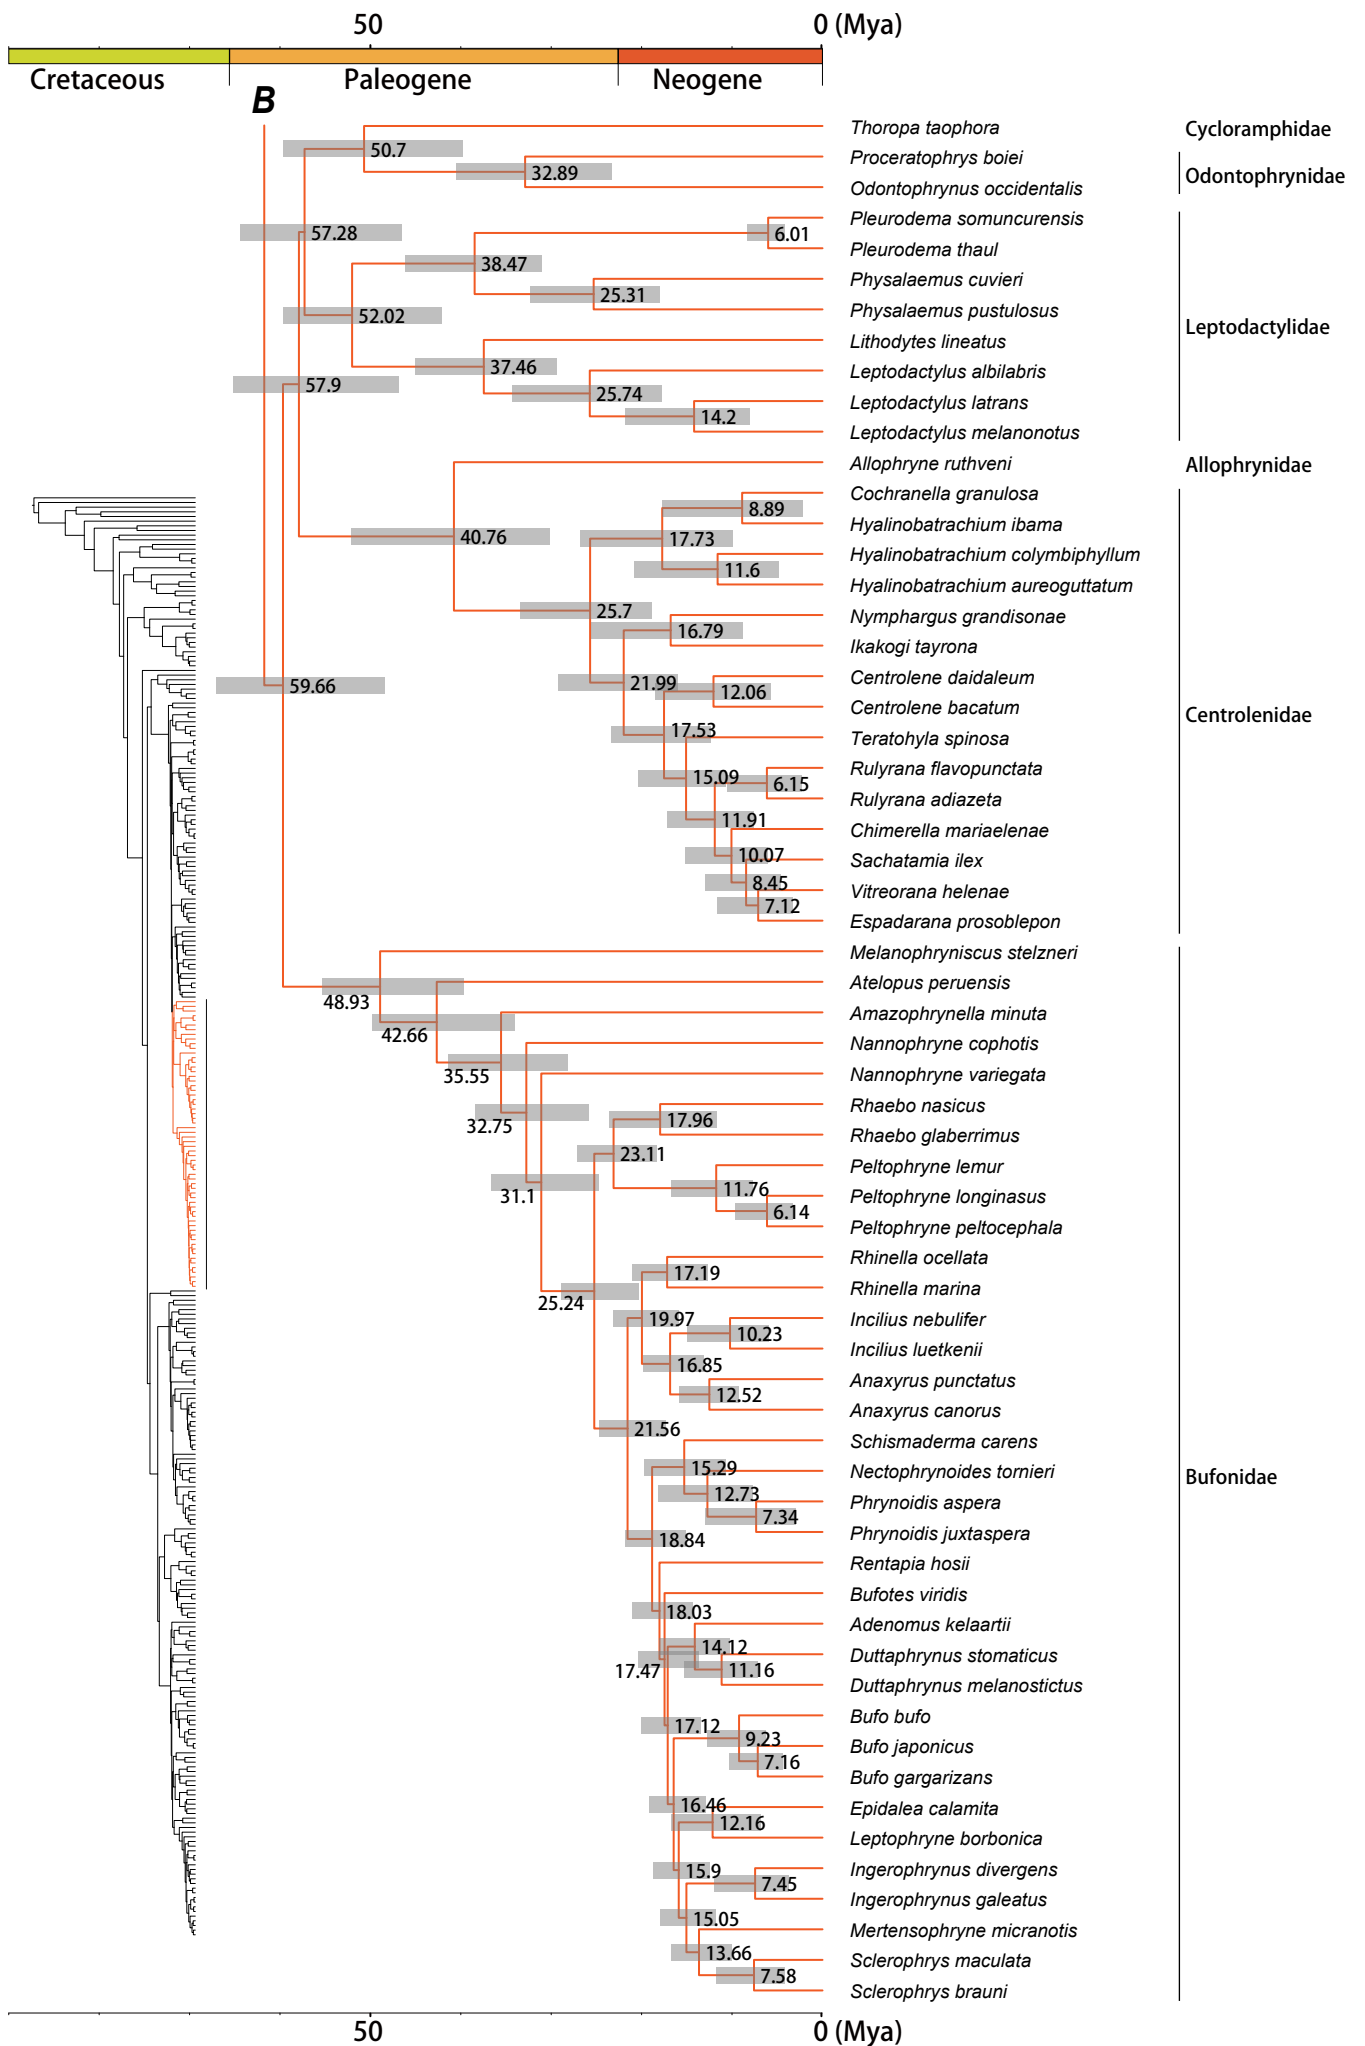

**C**

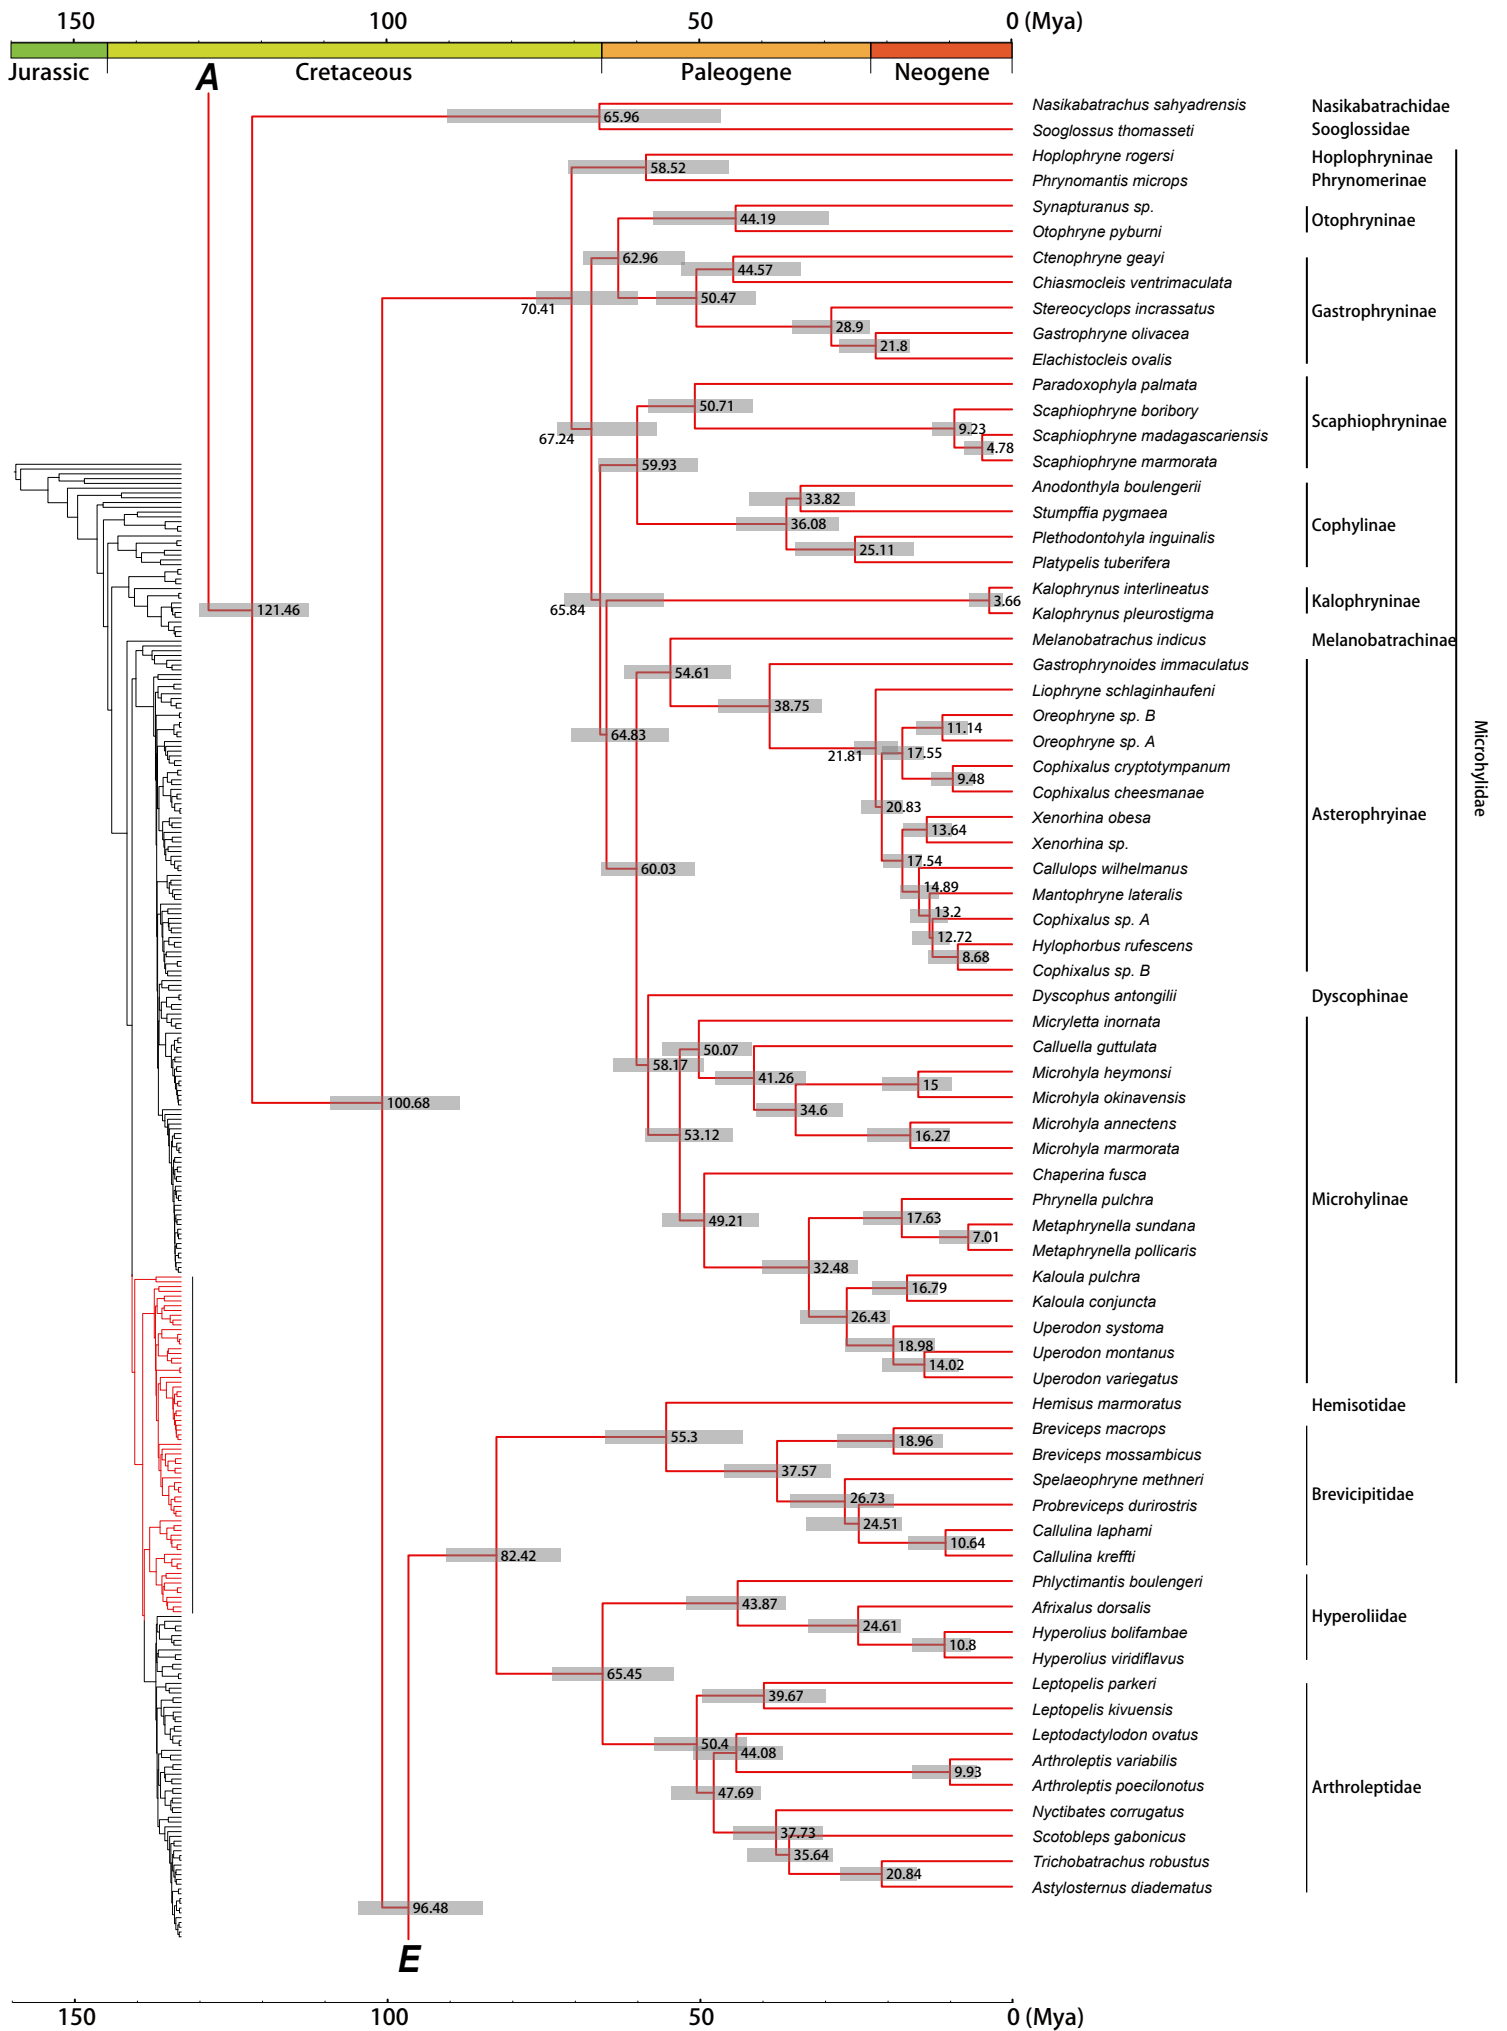

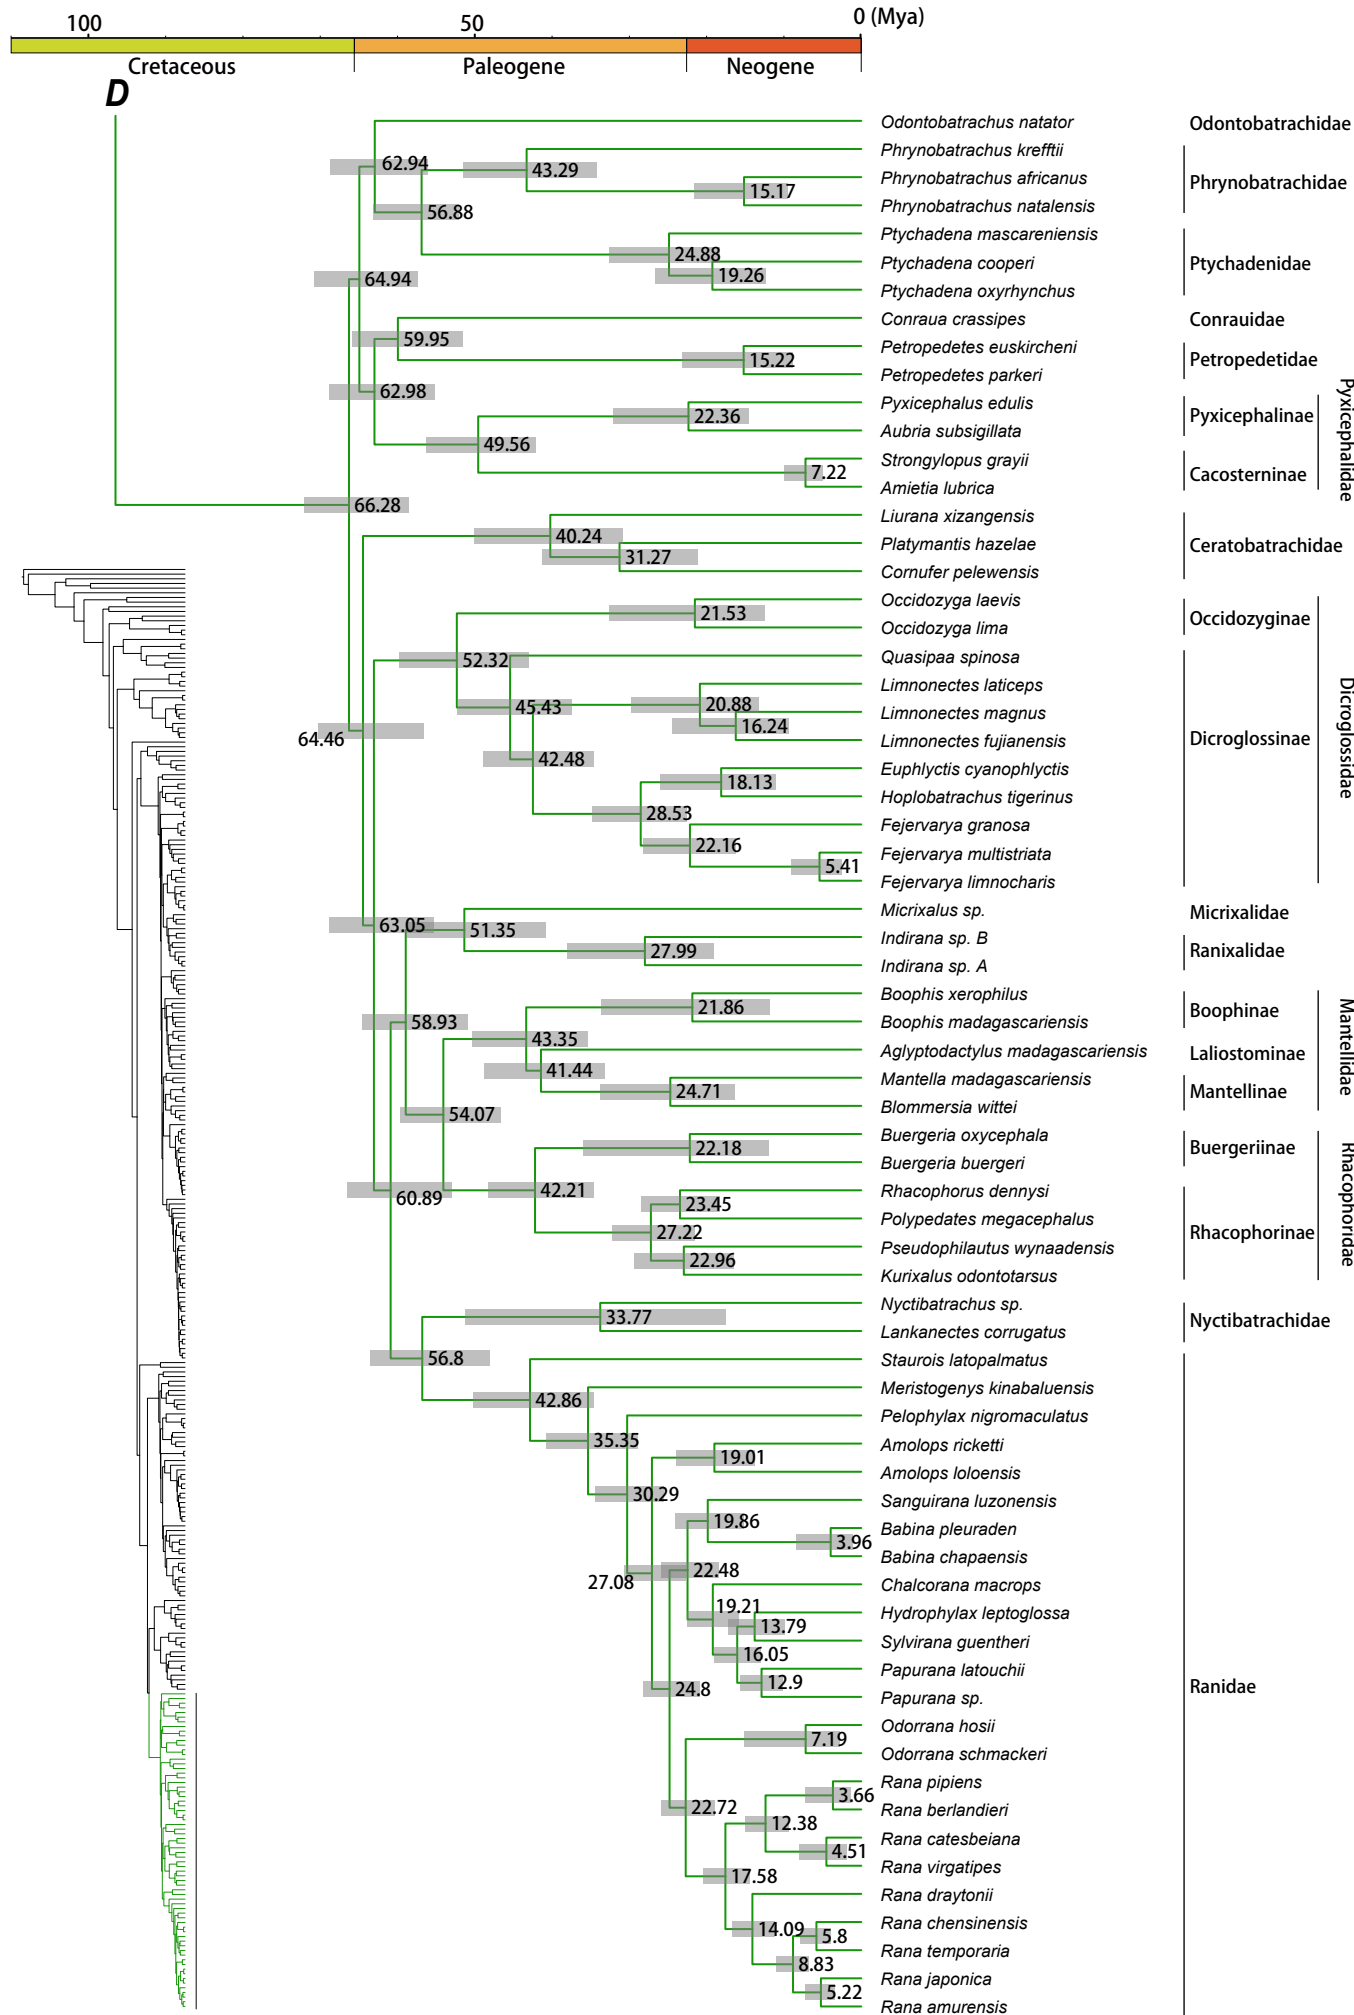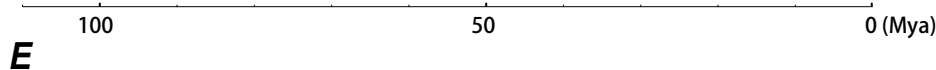

Supplement: pnas.1704632114.sfig06.pdf [file pnas.1704632114.sfig06.pdf]

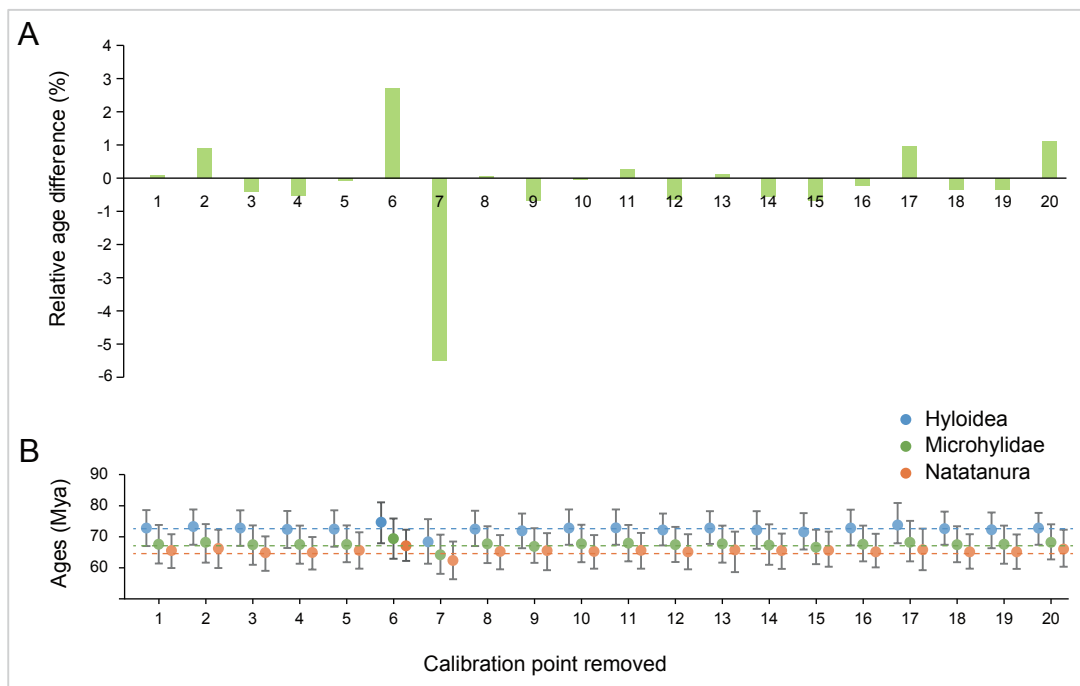

Supplement: pnas.1704632114.sfig08.pdf [file pnas.1704632114.sfig08.pdf]

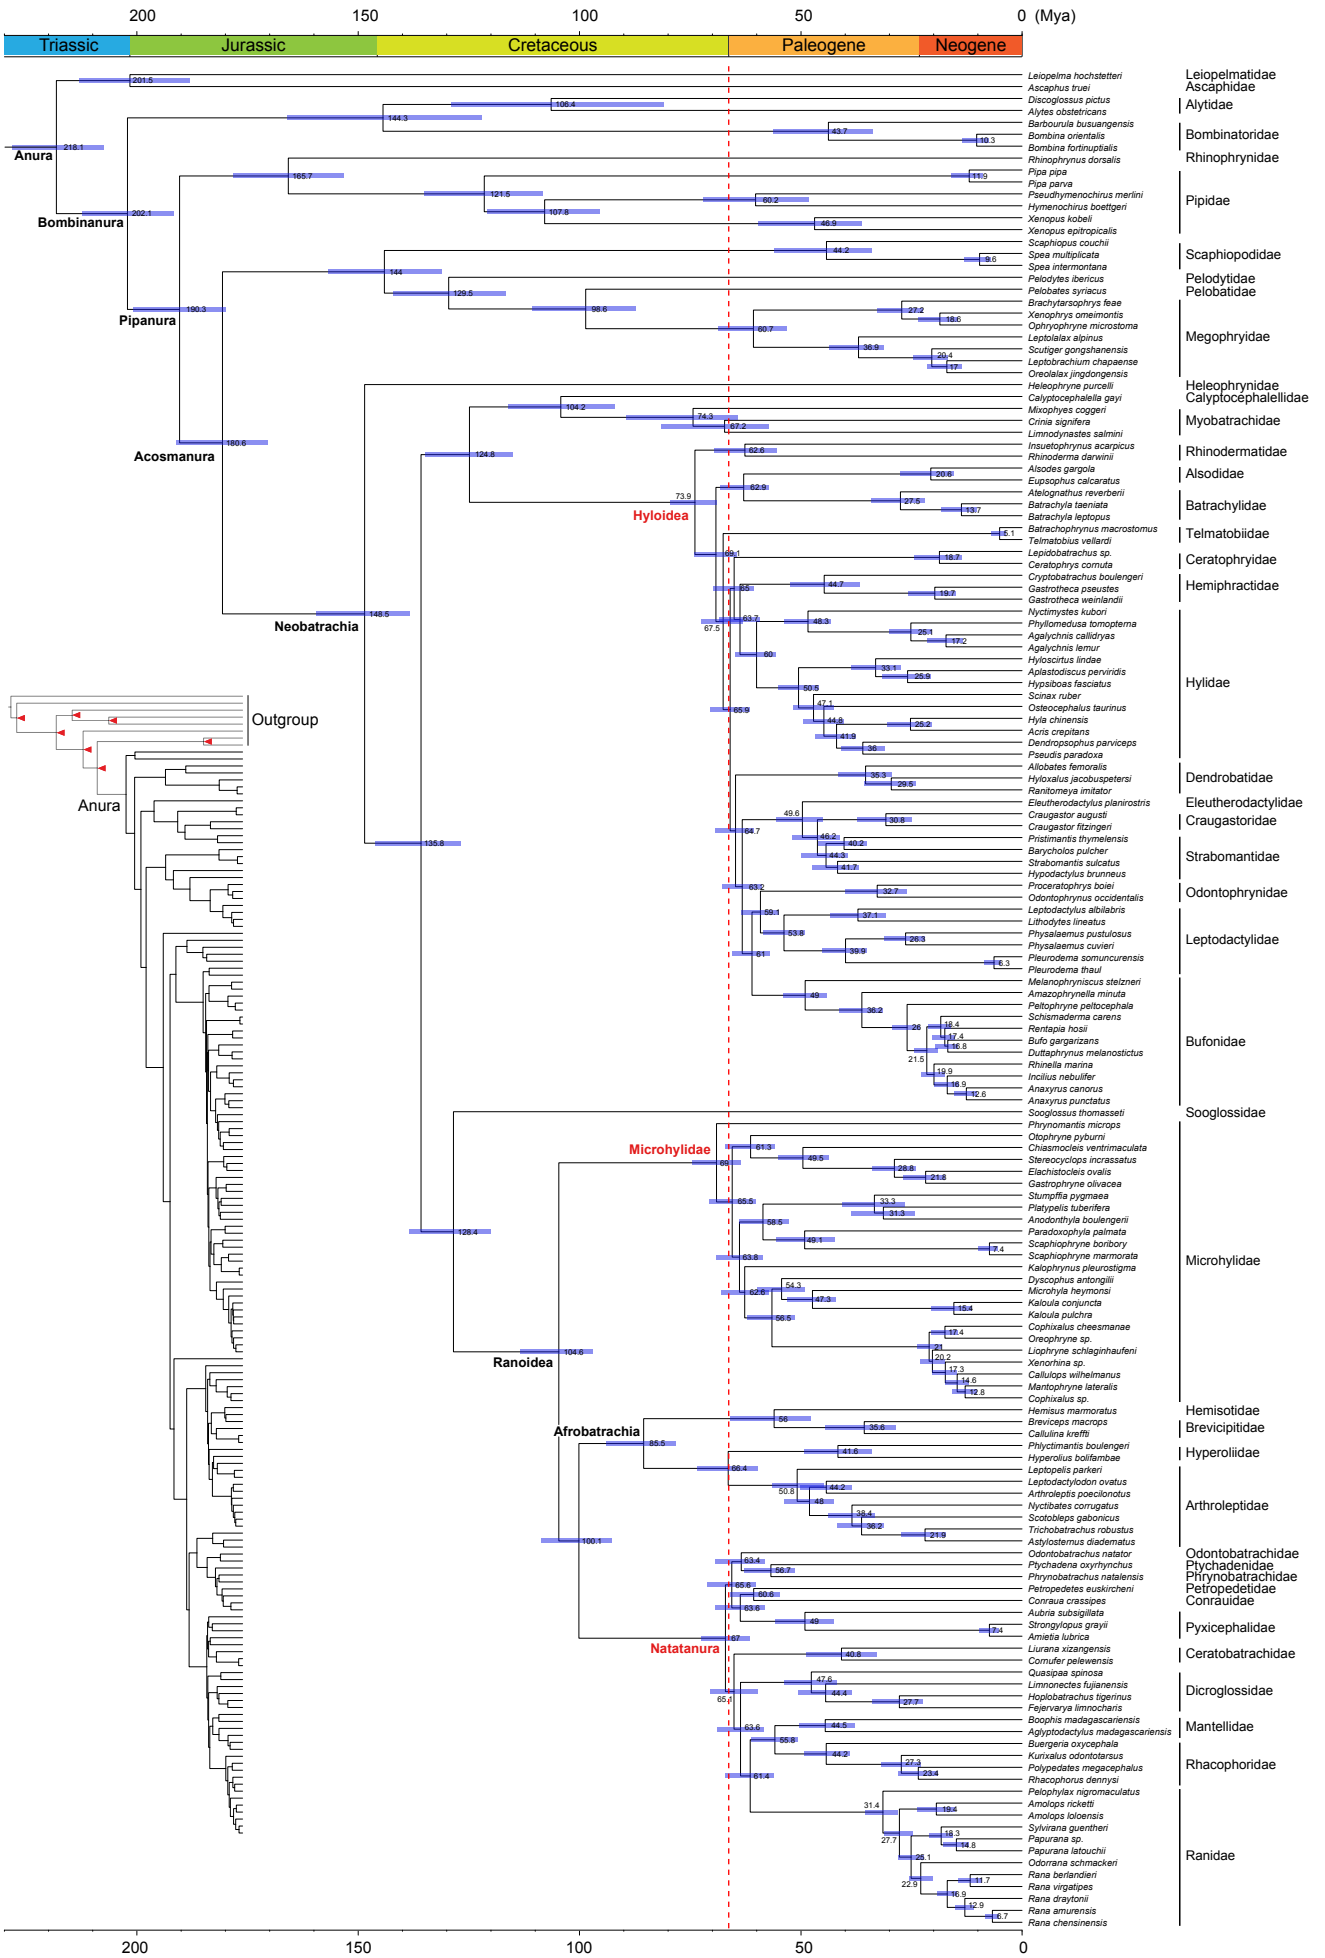

Supplement: pnas.1704632114.sfig10.pdf [file pnas.1704632114.sfig10.pdf]
